## Title Page

Title: Substrate binding and specificity appear as major forces in the functional diversification of eqolisins.

Authors: María Victoria Revuelta<sup>1,3,5</sup>, Nicolas Stocchi<sup>1,3</sup>, Priscila Ailín Lanza Castronuovo<sup>2,3</sup>,

5 Mariano Vera<sup>2</sup> and Arjen ten Have<sup>1,4</sup>

1 Instituto de Investigaciones Biológicas (IIB-CONICET-UNMDP), Facultad de Ciencias Exactas y Naturales, Universidad Nacional de Mar del Plata, CC 1245, 7600 Mar del Plata, Argentina; 2 QUIAMM-INBIOTEC-CONICET, Department of Chemistry – Facultad de Ciencias Exactas y Naturales, Universidad Nacional de Mar del Plata, Funes 3350, 7600 Mar del Plata, Argentina ; 3

10 These authors made equal contributions; 4 Corresponding author; 5 Current address: Department of Medicine, Hematology and Oncology Division, Weill Cornell Medicine, New York, New York 10065, USA.

revuelta.mv@gmail.com;

nicost1590@gmail.com;

priscilailin@hotmail.com;

dmavera@yahoo.com; tenhave.arjen@gmail.com

15

## Abstract

Background: Eqolisins are rare acid proteases found in archaea, bacteria and fungi. Certain fungi secrete acids as part of their lifestyle and interestingly these also have many eqolisin paralogs, up to seven paralogs have been recorded. This suggest functional redundancy and diversification, which  
20 was the subject of the research we performed and describe here.

Results: We identified eqolisin homologs by means of iterative HMMER analysis of the NR database. The identified sequences were scrutinized for which we defined novel hallmarks, identified by molecular dynamics simulations of mutants of highly conserved positions, using the structure of an eqolisin that was crystallized in the presence of a transition state inhibitor. Four  
25 conserved glycines were shown to be required for functionality. A mutation of W67F is shown to be accompanied by the L105W mutation. Molecular dynamics shows that the W67 binds to the substrate via a  $\pi$ - $\pi$  stacking and a salt bridge. The latter is stronger in the W67F/L105W double mutant. Additional likely fatal mutants are discussed.

Upon sequence scrutiny we obtained a set of 233 sequences that in all likelihood lacks false  
30 positives. This was used to reconstruct a Bayesian phylogenetic tree. We identified 14 specificity determining positions. These occur in two pairs that are explained by structural constraints as well as two sub-networks of real specificity determining positions. The first sub-network is related to substrate specificity whereas the second sub-network seems to affect the dynamics of three loops that are involved in substrate binding.

35

## 1 Introduction

### 1.1 Acid Proteases

The three major families of acid or carboxyl peptidases recognized by MEROPS are the well  
40 studied, pepstatin-sensitive, eukaryotic aspartic proteinases (A01, APs, for review see [1]), part of  
the aspartic proteinase clan A; the more recently identified sedolisins (S53) and the also novel  
eqolisins or glutamic peptidases (G01), both recently reviewed[2] . Both sedolisins and eqolisins  
were first thought to be pepstatin-insensitive variants of APs but the structures that were resolved  
showed they are unrelated. The rather recent discovery of these enzymes means we have relatively  
45 little knowledge. However, since both sedolisins and eqolisins are typically active below pH 4, they  
are interesting both from a fundamental and an applied angle. Here we study the eqolisins.

### 1.2 Eqolisins are Glutamic Peptidases

Eqolisins have been described in archaea, bacteria[3] and fungi but, interestingly, are not found in  
any non-fungal eukaryote[4]. Furthermore, eqolisins seem to have a rather unique and simple fold,  
50 which makes them straightforward targets for structure-function prediction. Eqolisins are  
endopeptidases synthesized as a preproprecursor proteins. The preprosegments are approximately 55  
amino acids in length, and the prosegments are rich in positively charged residues. Scytalido-  
carboxyl peptidase-B (SCP-B) from *Scytalidium lignicolum* is the enzyme that first described the  
eqolisin family of peptidases and its structure has been resolved (2IFW)[5]. Point mutation analyses  
55 revealed its catalytic site is formed by a catalytic dyad (Q53, E136), hence the name EQolisin. SCP-  
B has a narrow substrate specificity, with preference for small, basic residues, rather than the typical  
hydrophobic residues preferred by APs[1]. D43 is a residue that is important for SCP-B structure  
since the D43A mutant has approximately 20% of the original activity[6][7]. Other characterized  
eqolisins are *Aspergillus niger* carboxyl peptidase (ANCP)[8], which 3D structure has also been  
60 resolved (1Y43)[9], *Sclerotinia sclerotiorum* carboxyl peptidase[10], *Cryphonectria parasitica*  
peptidases B and C[11], *Talaromyces emersonii* carboxyl peptidase TGP1[12] and bacterial

*Alicyclobacillus* sp pepG1[3]. Eqolisins are composed of two seven-stranded anti-parallel  $\beta$ -sheets that fold in parallel and bend to form a structure resembling a half-pipe that forms the binding cleft (See Fig. 1). The catalytic Q53 and E136 (numbering according to SCP-B structure 2IFW) stick  
65 into the binding cleft. Pillai [13] described the 70's loop (Tyr71-Gly80) and the  $\beta$ -loop (Cys141-Cys148) that, upon interaction with a transition state inhibitor appear to move inwards and, thus, likely play a role in substrate binding and catalysis. They also indicated a high structural similarity of eqolisins with the carbohydrate-binding concanavalin A-like lectins/glucanases superfamily. Additional analyses indicate that residues Y64 to Y71 are highly conserved across all members of  
70 the G1 family [13].

**Figure 1: Structure of SCP-B Eqolisin.** Eqolisins consist of two pleated  $\beta$ -sheets (Cyan and green for inner and outer sheet respectively) that fold into a double convex halfpipe. E136 and Q53 stick into the binding cleft and form the catalytic site. The  $\beta$ -loop (purple) and 70's-loop (yellow) have  
75 been shown to migrate inwards during substrate binding.

### 1.3 Fungal Eqolisins have undergone a Process of Functional Redundancy and Diversification.

Since eqolisins have only been recently described, not much is known in terms of biological function. *T. emersonii*'s eqolisin gene *tgp1* was shown to be induced in the presence of an  
80 extracellular protein source, displays a rather broad specificity, is the most abundant protease in its secretome and is essential for the fungal growth [12]. Poussereau and collaborators described the importance of an eqolisin from plant pathogen *S. sclerotiorum* in the sunflower cotyledon infection process, suggesting a role in pathogenesis[10]. The number of paralogues in for instance related plant pathogenic fungus *Botrytis cinerea*, seven, suggests functional redundancy and diversification.  
85 This is also suggested by the fact that *B. cinerea* and *S. sclerotiorum*, as well as for instance many *Aspergilli*, secrete acids and seem to have relatively many eqolisins, as well as sedolisins and for

instance few basic subtilisins. Recently we studied the sedolisins[14], here, we explore the eqolisin protein family in order to identify which residues are likely required for function and which could be involved in functional diversification.

90

## 2 Materials and Methods

### 2.1 Identification of Eqolisin Homologues

The seed HMMER profile was made by means of *hmmbuild* using default settings and the MEROPS G1 alignment of holozymes (HMMER Version 3.0[15] ). This was used to iteratively  
95 screen the 107 complete proteome dataset previously used to identify Apsartic Proteases[16] and the HMMER NR database (W1). All sequences identified with an E-value smaller than the HMMER exclusion threshold were considered as Eqolisin homologues. Upon data acquisition, sequences were scrutinized for the presence of catalytic residues Q53 and E136, and secondary structure elements according to available resolved structures 2IFW and 1Y43. The novel dataset was then  
100 aligned by MAFFT[17] and used for iteration of *hmmbuild* and *hmmsearch* at the HMMER website. Iterations were performed until data convergence. Finally, sequences with long (>15 aa) inserts that appeared to lack homologous counterparts in any of the collected sequences or in a homologous sequence identified by BLAST in the non redundant database of NCBI, were removed

### 2.2 MSA and Phylogenetic Analysis

105 Multiple protein sequence alignments (MSAs) were performed using MAFFT[17] with slow iteration mode. Trimming for phylogeny was performed with BMGE[18] using the command options *-t AA -m BLOSUM30 -b 1 -h 0.9*. This setting did not remove subsequences corresponding to major secondary structure elements. A maximum likelihood (ML) phylogeny was built using PhyML-a-bayes [20][19] with the WAG model, estimated proportion of invariable sites, four rate  
110 categories, estimated gamma distribution parameter and optimized starting BIONJ tree, as determined by a prior estimation using ProtTest[20], with 10000 bootstraps branch support measure.

The ML tree was used as starting tree for Bayesian analysis using MrBayes[21]. Chains were initiated with ten perturbed trees using default settings until convergence was reached. Convergence was tested when split frequency was below 0.01 using Awty[22]. The resulting phylogenetic trees were viewed and edited with iTol version 2.0[23] or Dendroscope[24].

### 2.3 Molecular Modelling and Dynamics

Models for static analysis were made by I-Tasser[25].

The right protonation state of the wild type (WT) structural model (from PDB 2IFW) was determined by 19 reasonable protomers at pH=4.1, selecting the one with the clearly smaller RMSD after 40 ns of simulation (see below). The mutants W67F, W67F-L105W, L105W, P72K and G8A-G41A-G44A-G55A (hereafter GAx4) were prepared by replacing the side chain in the WT followed by local minimization using the AMBERTools[26] LEAP facility, The general setup for the MD simulations were setup as follows: I) 2500 steps steepest descent minimization of whole system, keeping the protein positionally restrained and embedded into a box of TIP3P water molecules with a minimum distance of 10 Å to each wall, and Cl<sup>-</sup> or Na<sup>+</sup> counterions to neutralize. II) 2500-5000 conjugate gradient minimization of the whole systems. III) 150 ps slowly heating in the NTV ensemble. IV) 40000 ps of simulation in the NTP ensemble, at 1 atm and 298.15 K. The procedure III-IV was repeated in three independent trajectories using the Langevin and twice the Andersen thermostat/barostats[27][28]. Then, 40 ns ps of NTP simulation of the WT under Andersen thermostat / barostat were used as reference for further for cross-correlations analysis, lowest normal modes visualization, and salt- and H-bridges inspection and comparison with the results obtained for the four mutants discussed below. In the equilibrated system, the density slightly fluctuated around 1.019 g/mL. Electrostatic interactions were computed using the Particle Mesh Ewald (PME) method with a cutoff of 10 Å[29][30]. Bonds involving hydrogen atoms were constrained using the SHAKE algorithm[30], this allowing for an integration time step of 0.0015 ps.

The integration was done using the pmemd.CUDA module of the AMBER14 program, with the ff14SB force field[31][32]. For the inhibitor, since most "residues" were of proteic nature, the same force field was applied, by manually modifying the connectivity of its backbone, the residues were  
140 labeled with three capital letters for distinguishing them from the protein, starting from 207 to 213: ACE207, PHE208, LYS209, PHE210, PSA211, LEU212 and AAR213. The trajectories were analyzed using standard AMBER analysis tools. The criteria for analyzing the persistence of H-bonds were set to a maximum length of 3.2 Å (between the heavy atoms) and a maximum angle of 120° (donor-H-acceptor). Analysis of the hydrogen bonds, contacts persistency, mobility factors and  
145 cross correlation functions were done using ccptraaj (AMBERTools 15 utilities) and VMD1.9.7[33] which was also used for graphics rendering. Essential normal modes were calculated using the last 30-35 ns and processing with principal components analysis as implemented in ProDy (W2).

The free energy calculations were done using the MM-PBSA module of AMBER 14 and  
150 reported for the two models applied, *i. e.* Poisson-Boltzman (PB) and Generalized Born (GB)[34]. [35]]. The energetic analysis was done from 5.0 to 40.0 ns of simulation.

#### 2.4 Additional Biocomputational Analyses

The SignalP[36] server was used to predict the presence of signal peptides, using complete sequences. Sequence LOGOS were created with WebLogo[37], and structures were aligned,  
155 visualized and edited with VMD[33].

### **3 Results and Discussion**

#### 3.1 Sensitive identification of Eqolisin Homologues likely lacks Specificity

The identification of eqolisin encoding sequences was performed with HMMER[15] in order to  
160 obtain high sensitivity. A profile made from the holotype sequences of MEROPS[38] was used as a seed. Initially, a collection previously used for a study of aspartic proteases[16], of mostly fungal,

but also other taxonomically well distributed eukaryotic complete proteomes were used. This resulted in few sequences, hence, the NR database was scanned and all identified sequences were combined and searched iteratively until data convergence. Then, since eqolisins have been  
165 described only recently and appear restricted to fungi, bacteria and a few archaea, there is little knowledge on which residues other than the catalytic Q53 and E136 are required. The initial sequence mining was therefore not specific and might have resulted in the inclusion of sequences from non-functional homologs (NFHs) or incorrectly predicted gene models. Such sequences would introduce noise in a direct but also an indirect way by negatively affecting the quality of the MSA.  
170 Given the broad taxonomic distribution we reasoned that residues that appear highly conserved, defined as >95% using Genedoc`s default scheme of conserved groups, in a preliminary MSA, must be important and might even be required. Structural analysis of apparent rare substitutions might shed light on eqolin functionality and clarify which of the highly conserved residues are actually strictly conserved, thereby identifying NFHs.

175 Fig. 2 shows an excerpt of a preliminary MSA that, besides 13 strictly conserved positions, had 10 highly conserved (>95%) positions that were all studied as part of a rigid sequence scrutiny. The complete preliminary MSA with all mentioned sequences can be found in S datafile 1. In order to determine if the highly conserved positions, are indicative for additional strictly required amino acids among functional eqolisins, we performed molecular dynamics.

180

**Figure 2: Excerpt of Multiple Sequence Alignment Eqolisins.**

*Indicated are the sequences for which a structure has been resolved (2IFW, 1Y43) as well a number of sequences selected to show overall sequence variation. The lower block contains sequences that were removed upon sequence scrutiny as described in the main text. The rulers indicate positions of  
185 hallmark residues and or positions described under the sequence scrutiny. Encircled cysteines are involved in disulfide bridges, indicated by lines. Shading indicates conservation (100% black; 80% dark-gray, 60% light-gray).*



### 3.2 Wild Type Dynamics.

We first determined the most optimal protonation state. The most likely protomer at pH=4.1 was  
190 chosen in terms of structure conservation of the X-ray structure after 50 ns of simulation. S Fig.1A  
shows the comparison of the better six (out of 19) plausible protomers of the WT structural model.  
The best state clearly shows the lowest RMSD, which remains below 0.93 Å after 40 ns of the  
simulation used. In addition, the co-crystallized inhibitor perfectly conserved its structure, main  
contacts and conformation during the whole simulation, with RMSD below 0.38Å (S Fig1B.).

### 195 3.3 Ecolisins have four strictly conserved Glycines

Three highly conserved glycine residues, G8, G41 and G44, found in the inner sheet together with  
strictly conserved G55, are, given glycine's high degree of liberty, envisaged to play a role in  
enzyme dynamics. EFAo000001 has G41E and G44S substitutions with surrounding subsequences  
substantially different from the otherwise highly conserved part of the MSA (Fig. 2). Hence, this  
200 sequence unlikely encodes for a functional eqolisin and G41 as well as G44 might be considered as  
strictly conserved.

In order to analyze the roles of the four glycines we performed molecular dynamics with the  
GAx4 mutant as compared to WT. Fig. 3A clearly shows that the GAx4 substitution yielded a much  
higher backbone RMSD, similar results were obtained for the overall RMSD on the inhibitor. A  
205 view of the structure averaged over the last 5 ps of the simulation shows (Fig. 3B1) a major change  
in the 70's and  $\beta$ -loops as well as a third loop that is stabilized by a disulfide bridge, hence referred  
to as the C-loop. The  $\beta$ -loop causes a clear loss of hydrophobic contacts with the transition state  
inhibitor. In addition, the GAx4 mutant shows both a repositioning of the catalytic dyad (E136/Q53)  
(Fig. 3B2) and a depleted H-bond donor/acceptor capacity, as compared to the WT (Fig. 3C), the  
210 net loss being between 3 and 4 H-bond contacts on the average.

**Fig. 3. Molecular Dynamics Analyses of G8A-G41A-G44A-G55A mutant.** (A) Comparison of the  
backbone RMSD of the WT and the G8A-G41A-G44A-G55A mutant.(B1) Comparison of the initial

(red) and final (37.000 to 37.005 ns, in blue) structures of the G8A-G41A-G44A-G55A mutant. The inhibitor (Inh) represented in licorice. the mutated residues in green (on the cartoon). (B2) Rotated  
215 view with the catalytic dyad indicated. (C) Number of H-bonds (smoothed as running average over 250 ps) as donor and as acceptor of the WT and the GAx4 mutant along the dynamics. (D1) Depletion of the contacts to the inhibitor in the GAx4 mutant (red) with respect to the WT (black) directly due to the G44A substitution, the backbone O with the backbone H of the inhibitor residue AAR213 is weakened. (D2) G44A substitution causes that the salt bridge involving the contiguous  
220 D45 with AAR213 is weakened. (D3) G8A substitution causes a weakened H-bond involving Q182 alcohol O with AAR213.

The above considerations preliminarily reveal a serious change in both structure and functionality. In order to confirm these observations, the actual standard free energy of binding of the  
225 eqolisin/inhibitor complexes were calculated for the WT and the GAx4 mutant using two different models (GB and PB) on the last 35 ns of the equilibrated trajectories (Table 1). The substitution of these essential glycines causes a depletion of about 33 and 34 kcal/mol (GB and PB models, respectively). An analysis of the essential modes of motion of the complex and the individual contacts was required to rationalize such a high change in the affinity for the substrate for the  
230 mutant as well as for establishing the role of each of the four GxA substitutions. The overall cross-correlation function of G41, G55 in their  $\beta$ -sheets and G44 (and the subsequent C-loop) shows they are correlated with the inhibitor (res # 207-213), the  $\beta$ -loop (res. #141-148), the 70's loop as well as with Q53 and W67 (Data not shown), correlations that are diminished or lost in the GAx4 mutant .

235 **Table 1. Calculated free energies of binding.**

|                           | $\Delta G^0$ binding / kcal/mol |          |
|---------------------------|---------------------------------|----------|
| Protein/Inhibitor complex | PB model                        | GB model |

|                    |        |        |
|--------------------|--------|--------|
| wt                 | -78.74 | -92.88 |
| G8A-G41A-G44A-G55A | -45.10 | -60.24 |
| W67F               | -69.73 | -86.64 |
| W67F-L105W         | -83.39 | -93.54 |
| L105W              | -75.03 | -89.68 |
| P72K               | -72.82 | -86.89 |

The correlations of their motions, some of which are rather long-ranged, can be rationalized by means of the contribution given by the first three lowest essential normal modes shown on S Fig. 2. Two of the three first modes are remarkably different for GAx4 with respect to WT.

240 Two additional evident observations about the role of these glycines are revealed in the dynamics of the WT. G44 itself is forming an H-bond to the AAR213@H residue of the inhibitor through its backbone O. The G55 is tightly H-bonded through their backbones with W67 and G44; the latter is at the beginning of the turn lead by D45, which is comprised in a tight salt bridge with the positively charged guanydonium group of the AAR213 residue of the inhibitor, also persistent  
245 during the whole simulation in the WT. On the other hand, G8 (which has also a high cross-correlation value with AAR213 and participates into the lowest essential mode) is H-bonded with the backbone of Q182, which is also H-bonded to AAR213 through its alcohol oxygen during the whole simulation of the WT. The change in the flexibility of the backbone of G4 and G44 by the alanines in the mutant clearly affects both directly and indirectly these three strong contacts:  
250 D45@Od – AAR213@Hh22 (because of A44) , A44@O–AAR213@H (because of A44 itself) and Q182@Og – AAR213@Hh12 (because of A8). Figure 3D and E illustrate the persistence of these contacts along the whole simulation for the WT and their depletion in the GAx4 mutant.

As a result of these evaluations, we consider G8, G41 and G44 as strictly conserved, which we included in the sequence scrutiny in order to obtain a specific dataset that lacks noise in the  
255 structure-function analysis.

### 3.4 Co-evolution of W67F and L105W Mutations resulted in higher Binding Energy to Inhibitor

Another highly conserved residue is W67. Figure 4A shows that the bulky and rigid side-chain of W67 is involved in positioning Q53, assisted by the strictly conserved E69. Furthermore, its benzene ring forms a  $\pi$ - $\pi$  stacking with the PSA211 from the transition state inhibitor that was crystallized with SCP-B (See Fig. 4B). This indicates a role in substrate binding. Eight sequences show substitution W67F. Albeit smaller, a phenylalanine can still be envisaged to fulfill both hypothesized functions. Interestingly, all sequences, although from a single clade, also show W105 which is an otherwise highly conserved small hydrophobic residue (L, I, V or M) in the outer pleated  $\beta$ -sheet directly below position 67. The more bulky W105 can be envisaged to change the conformation of the inner pleated  $\beta$ -sheet such that the aromatic ring of the F67 occurs at the same position as the typical W67, thereby sustaining for the  $\pi$ - $\pi$  stacked stabilization of the substrate. In order to test this hypothesis and isolate the main structural factors which could rationalize it, the W67F, L105W and the double mutant (W67F/L105W) were simulated by means of molecular dynamics. The  $\pi$ - $\pi$  stack of mutant W67F shows a similar RMSD as the WT, L105W shows a slightly higher RMSD whereas double mutant W67F/L105W showed a slightly reduced RMSD. (Fig. 4C and D). Similar results were obtained for total inhibitor RMSD (S Fig 3). Additional noticeable differences arose, especially in the case of L105W, which was unable to keep residue 209 of the inhibitor tightly bound during the whole simulation. Subtle differences, with impact in the overall energy balance, also appeared for W67F. L105W and W67F show about 3 and 6 kcal/mol, respectively (similar for PB and GB models See Table 1), less affinity for the substrate analog than the WT. On the other hand, the double mutant yielded a free energy of binding more favored than the WT (4 and 1.3 kcal/mol more negative than the WT for PB and GB, respectively). This suggest bulkier W105 pushes F67 up to the aromatic moiety of the inhibitor, thus leading to a  $\pi$ - $\pi$  interaction even better than if it were W67/L105.

280

**Figure 4: Structural and Molecular Dynamics of W67F and W67F-L105W mutants.**

(A) Cartoon of 2IFW showing I51 (purple) at the start of a  $\beta$ -sheet as well as W67 (yellow) and E69 (cyan) relative to catalytic Q53. (B) Cartoon of 2IFW detailing the  $\pi$ - $\pi$  stack between W67 (yellow) and P2-Phe from the transition state inhibitor. (C) Cartoon of 2IFW showing  $\pi$ - $\pi$  stacking (green licorice) and salt bridge (orange licorice) between eqolisin and transition state inhibitor. (D) Distance and its running average (over 500 ps, smoother solid line) for the  $\pi$ - $\pi$  stacking of residue 67 with the inhibitor PSA211 phenyl ring in the WT, the W67F and L105W mutants as well as the W67F-L105W double mutant as determined by Molecular Dynamics simulation (E) Distance between D57@Og and LYS209@Hz in the WT, the W67F and L105W mutants as well as the W67F-L105W double mutant as determined by Molecular Dynamics simulation.

Besides its direct interaction with PSA211, W67 seems to have other important mutual interactions, which were demonstrated in the WT dynamics. The squared cross-correlation function of W67 had an important peak for PSA211, but it also was correlated with G55, D57, D65, D77, L105 and D136 (all of them  $>0.55$ , S Fig. 4). In the double mutant, a bulkier W105 instead of the L not only pushes F67 up to the inhibitor, it also positions D57, in the WT comprised in a salt bridge interaction with the LYS209 of the inhibitor. A stable H-bond network between LYS209, D65 and D77 also depends on the right position of D57 for a tight salt bridge. Fig. 4C and 4E show the persistence and closeness of this contact during the simulation. Indeed, the combined W67F and L105W substitutions were found to be the optimal combination for properly holding D57 tightly bridged to the inhibitor. This would contribute to explain the favored binding energy for the double mutant. Besides its small improvement in the binding energy, it is worth to mention that the analysis of all the contacts (H-bonds, electrostatic and hydrophobic) from the double mutant closely resembles the analysis for the WT. Also the first essential modes are very similar to the WT as shown on the S Fig. 2. Thus whilst, either W67F or L105W substitution have little effect or depletes the binding modes and energy, the double mutant should equal or even improve the WT ability for binding this

substrate/ transition state analogue. As a result of these evaluations, we consider the W67F as a functional substitution.

### 3.5 The P to K Substitution at Position 72 depletes Affinity to Inhibitor

310 P72 has been reported to be part of the 70's loop, described by Pillai and collaborators[13] and six sequences in the initial set of sequences have a substitution in that position. First the aforementioned NFH EFBso00001 has a serine. Then, EFPde00001 (Fig. 2), EFMac00003, EFMan00003, and EFCm000003 have a lysine whereas EFCm000002 has a glutamine. The P72K substitution was modeled and a structural alignment (data not shown) shows a structural change in  
315 the  $\beta$ -loop. These sequences occur at a relative large distances in a preliminary tree, which is indicative for NFHs. Hence, all this suggest a proline at position 72 is required for eqolisin function.

In order to test the hypothesis that P72K is fatal, we performed molecular dynamics simulations with the P72K mutant. The structure is, in general, well conserved during the simulation (see S Fig. 5A, showing the backbone RMSD compared to the WT). The substitution has  
320 an overall effect less evident than in the case of W67F and fairly smaller than GAx4. Most contacts and the overall mode of binding to the inhibitor is similar to either the WT and the W67F-L105W. However the mobility of the 70's loop is affected and additional interactions involving the ammonium group of K62 and alternatively N144@O N144@Od appeared, thus altering the essential mode involving the 70's- and  $\beta$ -loops (see S Fig. 5B); all these interactions were absent in  
325 the WT, it having the hydrophobic and compact proline residue. The substitution P72K thus depleted the affinity of the mutant for the inhibitor by about 6 kcal/mol in both models for computing the  $\Delta G^0$  of binding. As a result of these evaluations, we consider the P72K mutation as fatal for functionality and sequences were removed accordingly. Since the P72S mutant also contains Q51 (see below) at a strict small hydrophobic site this is also pseudogene. Then, the  
330 remaining P72Q is also likely fatal. All the corresponding sequences were removed.

### 3.6 Additional low Frequency Substitutions.

A number of sequences have substitutions at position D43, which forms a minor turn in 2IFW (not shown) and has been shown to be important for function. (CITE6 o7). Three sequences, one bacterial and two eukaryotic, have S, which, when phosphorylated, is physicochemically similar to  
335 aspartic acid, hence these are envisaged non-fatal substitutions. Ten sequences have G43, a relatively large number that, combined with its appearance in fungi, bacteria and archaea suggests this is another acceptable substitution. Furthermore G is, given its high degree of liberty, often found at turns.

Position 51 has a highly conserved small hydrophobic residue, L, I or V, where EFTa000006  
340 has P instead. The isoleucine in 2IFW occurs at the start of an inner sheet element and has its side-chain pointing inward the halfpipe (Fig 3A). It seems unlikely that substitution by the rigid proline would not affect catalytic efficiency, hence we consider EFTa000006 (Fig. 2) as an NFH. EFBso00001 has Q51 (not shown) as well as the aforementioned P72Q mutation, hence this sequence also likely encodes an NFH. As such it seems a, likely small, hydrophobic residue is  
345 required at position 51. Sequences were removed accordingly.

Three bacterial sequences have a phenylalanine at position 89 that is otherwise characterized by VILM. Since phenylalanine is hydrophobic, this appears as an allowed substitution. Position 105 is another conserved hydrophobic site, typically constituted by VILM but shows, besides the above discussed Ws, two instances of phenylalanine, one of tyrosine and one of glutamate. The glutamate  
350 substitution in BCa0000005 would result in a buried but charged side-chain, which could be explained by a co-evolved basic residue, which could not be identified. Hence, this is likely a fatal substitution. The tyrosine substitution in APf0000001 might well be a problem of erroneous sequencing or gene modeling since it is surrounded by a stretch of about 20 to 40 amino acids that poorly align and the sequence was removed. The two instances of phenylalanine substitutions in  
355 bacterial (Bgt0000001) and eukaryotic EFCm000005 introduce another hydrophobic but larger residue and given the partial solvent exposure, it can be envisaged this substitution is not fatal.

Finally, the highly conserved site 133 has VILM and two, likely partial sequences (EFFo000002 and EFNh000001) showing a gap in the MSA were also removed.

### 3.7 Phylogenetic Clustering suggests Fungal Eqolisins have resulted from an ancient LGT Event.

360 Following the sequence scrutiny, a new MSA was made, subjected to trimming of poorly aligned subsequences and used for phylogeny. First a maximum-likelihood tree was constructed, which was then used to initiate a Bayesian analysis. Figure 5A shows an annotated radial phylogram, a radial cladogram is shown in figure 5B. Cluster assignment was made based on monophyly and, more importantly, taxonomical considerations. Apart from two orphan sequences, prokaryotic (archaeal  
365 and bacterial) and fungal sequences cluster separately which suggests a common ancestor at the connecting node. However, a taxonomical distribution analysis (Fig. 5C) points towards an alternative common ancestor. The majority of the sequences are found in the subphylum pezizomycotina, which is further classified in the classes of dothideomycetes, eurotiomycetes, pezizomycetes and sordariomycetes. Clade III is the only monophyletic clade with sequences of all  
370 four classes, which suggests the common ancestor corresponds with the node between the clade containing subclades I, II and III and the rest of the tree. This is substantiated by the sequence logo analysis (figure 6A) presented in the description of the structure function analysis. All other assigned clades were selected based on monohyly and size (a requirement of at least 10 members was set arbitrarily).

375 Lateral gene transfer (LGT) seems to have had an important role in the eqolisin phylogeny. The two orphan sequences are clear examples of LGT. Furthermore, the lack of eqolisin encoding sequences in eukaryotes other than fungi points towards an ancestral LGT event. The taxonomical distribution of sequences suggests this ancestral LGT has taken place between a bacterium and the ancestor of the Dikarya. The absence of introns in many, albeit not all fungal sequences corresponds  
380 with the proposed ancestral LGT

### 3.8 Functional Diversification of Substrate Binding Site



Since a number of fungi have various paralogs in well separated clades, fungal eqolisins might have been subject to functional diversification. We performed analyses in order to identify first Cluster Determining Positions (CDPs) and then Specificity Determining Positions (SDPs). CDPs are  
385 positions in the protein (or columns in the corresponding MSA) that significantly contribute to clustering. These are the result of either genetic drift (i.e. neutral substitutions) or selection, which would mean they are somehow related to functional or structural diversification. Functionally, but also structurally, important residues are likely to show moderate to high levels of interaction with other residues, which can be determined with the measure of mutual information (MI). Hence,  
390 CDPs that show high MI with other residues are likely important in either maintaining the structure or functional diversification. Since MI reflects co-variation, groups of CDPs and other positions that are directly connected via significant MI values are expected to affect the same functional aspect.

CDPs were identified using SDPfox[39], using the clustering indicated in Figure 5. Out of 28 CDPs that were identified, 20 showed significant cumulative MI levels, as determined by  
395 Mistic[40], of which a total of 14 could be confirmed by H2Rs[41]. A resume of the SDP identification is shown in Supplemental Table 1 that also contains a description of the binding cleft, based on the work of Pilai and co-workers on SCP-B[13]. Sequence logos of the SDPs, according to the clustering shown in the phylogeny of Figure 5, are shown in Figure 6A alongside the MI network, defined as the subnetwork of nodes that directly connect to at least one other node with  
400 significant MI, obtained by Mistic (Figure 6B). The MI network consists of three fully connected subnetworks. The large connected subnetwork contains an intricate central module of nodes, mostly corresponding to highly conserved sites, with some branches with lower levels of connections. This central module conceptually corresponds with the core eqolisin function and lacks SDPs. Two pairs of paired SDPs, (35 and 59; and 23 and 91 respectively) are found in one of the branches with low  
405 connection levels and appear to be the result of co-evolution driven by of structural compensation. The sequence logo shows SDP35 and 59 have a preferred C in both clade VI and VIII that,

combined with their proximal 3 dimensional location, points toward a possible disulfide bridge. SDPs 23 and 91 are likely involved in an important hydrophobic interaction given the substitution pattern shown in figure 6A and their 3 dimensional proximity in the protein (not shown). A group of  
410 four directly connected SDPs (47, 52, 95 and 127) is found in one of the branches with lower levels of connections. SDP50 connects via single non SDP to SDP52 and SDP95. A second group of four directly connected SDPs 65, 77, 78 and 103 locates into one of the small (n=11) subnetworks that also includes SDP34. The second small (n=5) subnetwork contains no SDPs.

The SDP group in the small subnetwork is dominated by the clearly preferred D65, D77 and  
415 F78 in groups IV to IX (Fig. 6A). Fig. 7 shows how D65 and D77, that are part of subsite S3 interact with the substrate: both acid side chains interact directly with the basic sidechain of the Lys in the substrate analogue. F78 does not form part of the binding cleft, but interacts directly with its neighbor D77. A103 connects to F78, having an MI value of 6.7 and figure 6B shows they interact physically. Hence, SDPs 65 and 77 are predicted to affect substrate specificity, particularly  
420 concerning P3. Positions 78, 103 likely give some sort of structural support. The information contents at positions 65 and 77 in the various clades is likely indicative for substrate specificity.

The SDP group in the large subnetwork contains SDPs dominated by the Cysteins at 47 and 127 that form a disulfide bridge in SCP-B and which are present in most sequences, except for those in clades I and IV (Fig. 6A). In SCP-B the disulfide bridge stabilizes a hitherto un-described loop  
425 from position 44 to 51 which we refer to as the C-loop. Figure 8A shows the C-loop, the disulfide bridge as well as the 70s loop since the central position in group 2 is taken by position 70, a Tyr in SCP-B. This suggests the C-loop interacts with the 70s-loop, which has been shown to be important in binding dynamics. Figure 8B demonstrates that in SCP-B both SDPs A50 and L52 interact physically with Y70, likely influencing the mutual positioning of the 70s- and C-loops. Clade IV  
430 sequences have Y47, which appears to be compensated by the substitution C127A. SDP127 is connected with SDP95, which is encountered in the outer sheet just below the inner sheet and the C-

loop. This suggests a secondary, structural compensation but the substitution pattern (A95S) does not give any clue on how this might be established. The C-loop contains four residues that are part of the binding cleft (Supplemental Table 1) of which, interestingly 51 is another CDP that does not  
435 form part of the network. All together this suggests that the C-loop is involved in the dynamics that lead to substrate binding.

#### 4 Conclusions

Only few eqolisins exist but interestingly fungi that secrete acid as part of their lifestyle can have up to seven paralogs, which implies functional redundancy and diversification. This was studied using  
440 a stringently mined sequence set. A number of sequences we removed might be functional but we prefer to prevent possible contamination with sequences of NFHs. An interesting case of recent molecular evolution was identified, resulting in a most likely more active enzyme. Furthermore we detected two groups of SDPs, one that very likely is involved in substrate specificity given two of the SDPs form part of the binding cleft. The other group seems to affect loop dynamics. Some of  
445 the additionally identified CDPs might also be SDPs but the lack of MI signal cannot corroborate them.

## Legends Supplemental Figures

S Fig. 1. Molecular Dynamics Simulation determining best protomer state. (A) Backbone RMSD of the best protomer for the WT compared to five of the other best. (B) Backbone RMSD of substrate analog inhibitor for the best protomer for the WT compared to five of the other best.

450

S Fig. 2. A1-A3, Ca vectors of the first essential normal mode from PCA analysis for the GAx4, WT and W67F-L105W species. A4, the squared displacement of each residue in the first mode. B-C squared displacement of each residue on the next two modes.

455

S Fig. 3. RMSD of the inhibitor residues for the WT, W67F, L105W and the double mutant.

S Fig. 4. Squared cross correlation function of W67 against all other residues (wt trajectory).

460 S Fig. 5. Backbone RMSD comparison for the WT and the P72K mutant.

## References

- [1] B.M. Dunn, Structure and mechanism of the pepsin-like family of aspartic peptidases., *Chem. Rev.* 102 (2002) 4431–58. <http://www.ncbi.nlm.nih.gov/pubmed/12475196> (accessed July 11, 2017).
- [2] K. Oda, New families of carboxyl peptidases: serine-carboxyl peptidases and glutamic peptidases, *J. Biochem.* 151 (2012) 13–25. doi:10.1093/jb/mvr129.
- [3] K. Jensen, P.R. Oestergaard, R. Wilting, S.F. Lassen, Identification and characterization of a bacterial glutamic peptidase, *BMC Biochem.* 11 (2010) 47. doi:10.1186/1471-2091-11-47.
- 470 [4] A.H. Sims, N.S. Dunn-Coleman, G.D. Robson, S.G. Oliver, Glutamic protease distribution is limited to filamentous fungi, *FEMS Microbiol. Lett.* 239 (2004) 95–101. doi:10.1016/j.femsle.2004.08.023.
- 475 [5] M. Fujinaga, M.M. Cherney, H. Oyama, K. Oda, M.N.G. James, The molecular structure and catalytic mechanism of a novel carboxyl peptidase from *Scytalidium lignicolum*, *Proc. Natl. Acad. Sci.* 101 (2004) 3364–3369. doi:10.1073/pnas.0400246101.

- [6] Y. Kataoka, K. Takada, H. Oyama, M. Tsunemi, M.N.G. James, K. Oda, Catalytic residues and substrate specificity of scytalidoglutamic peptidase, the first member of the eqolisin in family (G1) of peptidases., *FEBS Lett.* 579 (2005) 2991–4. doi:10.1016/j.febslet.2005.04.050.
- 480 [7] M.Y. Kondo, D.N. Okamoto, J.A.N. Santos, M.A. Juliano, K. Oda, B. Pillai, M.N.G. James, L. Juliano, I.E. Gouvea, Studies on the Catalytic Mechanism of a Glutamic Peptidase, *J. Biol. Chem.* 285 (2010) 21437–21445. doi:10.1074/jbc.M110.122432.
- [8] K. Kubota, W. Nishii, M. Kojima, K. Takahashi, Specific Inhibition and Stabilization of Aspergilloglutamic Peptidase by the Propeptide, *J. Biol. Chem.* 280 (2005) 999–1006. doi:10.1074/jbc.M410852200.
- 485 [9] J.P. Wubben, W. Mulder, A. Ten Have, J.A.L. Van Kan, J. Visser, Cloning and partial characterization of endopolygalacturonase genes from *Botrytis cinerea*, *Appl. Environ. Microbiol.* 65 (1999) 1596–1602. <http://www.ncbi.nlm.nih.gov/pubmed/10103256> (accessed April 21, 2017).
- 490 [10] G. Billon-Grand, S. Creton, N. Poussereau, M. Fevre, C. Rasclé, Regulation of *acp1*, encoding a non-aspartyl acid protease expressed during pathogenesis of *Sclerotinia sclerotiorum*, *Microbiology.* 147 (2001) 717–726. doi:10.1099/00221287-147-3-717.
- [11] P. Jara, S. Gilbert, P. Delmas, J.C. Guillemot, M. Kaghad, P. Ferrara, G. Loison, Cloning and characterization of the *eapB* and *eapC* genes of *Cryphonectria parasitica* encoding two new acid proteinases, and disruption of *eapC*., *Mol. Gen. Genet.* 250 (1996) 97–105. <http://www.ncbi.nlm.nih.gov/pubmed/8569693> (accessed July 12, 2017).
- 495 [12] A.J. O’Donoghue, C.S. Mahon, D.H. Goetz, J.M. O’Malley, D.M. Gallagher, M. Zhou, P.G. Murray, C.S. Craik, M.G. Tuohy, Inhibition of a Secreted Glutamic Peptidase Prevents Growth of the Fungus *Talaromyces emersonii*, *J. Biol. Chem.* 283 (2008) 29186–29195. doi:10.1074/jbc.M802366200.
- 500 [13] B. Pillai, M.M. Cherney, K. Hiraga, K. Takada, K. Oda, M.N.G. James, Crystal Structure of Scytalidoglutamic Peptidase with its First Potent Inhibitor Provides Insights into Substrate Specificity and Catalysis, *J. Mol. Biol.* 365 (2007) 343–361. doi:10.1016/j.jmb.2006.09.058.
- [14] F. Orts, A. ten Have, Functional Diversification of Tripeptidylpeptidase and Endopeptidase Sedolisins in Fungi, *bioRxiv.* (2017). <http://www.biorxiv.org/content/early/2017/07/22/167379> (accessed July 23, 2017).
- 505 [15] S.R. EDDY, A NEW GENERATION OF HOMOLOGY SEARCH TOOLS BASED ON PROBABILISTIC INFERENCE, in: *Genome Informatics 2009*, PUBLISHED BY IMPERIAL COLLEGE PRESS AND DISTRIBUTED BY WORLD SCIENTIFIC PUBLISHING CO., 2009: pp. 205–211. doi:10.1142/9781848165632\_0019.
- 510 [16] M. V. Revuelta, J.A.L. van Kan, J. Kay, A. ten Have, Extensive Expansion of A1 Family Aspartic Proteinases in Fungi Revealed by Evolutionary Analyses of 107 Complete Eukaryotic Proteomes, *Genome Biol. Evol.* 6 (2014) 1480–1494. doi:10.1093/gbe/evu110.

- [17] K. Katoh, D.M. Standley, MAFFT Multiple Sequence Alignment Software Version 7: Improvements in Performance and Usability, *Mol. Biol. Evol.* 30 (2013) 772–780. doi:10.1093/molbev/mst010.
- [18] A. Criscuolo, S. Gribaldo, BMGE (Block Mapping and Gathering with Entropy): a new software for selection of phylogenetic informative regions from multiple sequence alignments, *BMC Evol. Biol.* 10 (2010) 210. doi:10.1186/1471-2148-10-210.
- [19] S. Guindon, J.-F. Dufayard, V. Lefort, M. Anisimova, W. Hordijk, O. Gascuel, New Algorithms and Methods to Estimate Maximum-Likelihood Phylogenies: Assessing the Performance of PhyML 3.0, *Syst. Biol.* 59 (2010) 307–321. doi:10.1093/sysbio/syq010.
- [20] F. Abascal, R. Zardoya, D. Posada, ProtTest: selection of best-fit models of protein evolution, *Bioinformatics.* 21 (2005) 2104–2105. doi:10.1093/bioinformatics/bti263.
- [21] F. Ronquist, J.P. Huelsenbeck, MrBayes 3: Bayesian phylogenetic inference under mixed models., *Bioinformatics.* 19 (2003) 1572–4. <http://www.ncbi.nlm.nih.gov/pubmed/12912839> (accessed July 13, 2017).
- [22] J.A.A. Nylander, J.C. Wilgenbusch, D.L. Warren, D.L. Swofford, AWTY (are we there yet?): a system for graphical exploration of MCMC convergence in Bayesian phylogenetics, *Bioinformatics.* 24 (2008) 581–583. doi:10.1093/bioinformatics/btm388.
- [23] I. Letunic, P. Bork, Interactive Tree Of Life (iTOL): an online tool for phylogenetic tree display and annotation, *Bioinformatics.* 23 (2007) 127–128. doi:10.1093/bioinformatics/btl529.
- [24] D.H. Huson, C. Scornavacca, Dendroscope 3: An interactive tool for rooted phylogenetic trees and networks, *Syst. Biol.* 61 (2012) 1061–1067. doi:10.1093/sysbio/sys062.
- [25] J. Yang, R. Yan, A. Roy, D. Xu, J. Poisson, Y. Zhang, The I-TASSER Suite: protein structure and function prediction, *Nat. Methods.* 12 (2014) 7–8. doi:10.1038/nmeth.3213.
- [26] D.M.Y. and P.A.K. D.A. Case, D.S. Cerutti, T.E. Cheatham, III, T.A. Darden, R.E. Duke, T.J. Giese, H. Gohlke, A.W. Goetz, D. Greene, N. Homeyer, S. Izadi, A. Kovalenko, T.S. Lee, S. LeGrand, P. Li, C. Lin, J. Liu, T. Luchko, R. Luo, D. Mermelstein, K.M. Merz, G. Monard, H., AMBER 2017, University of San Francisco, San Francisco, 2017.
- [27] R.J. Loncharich, B.R. Brooks, R.W. Pastor, Langevin dynamics of peptides: The frictional dependence of isomerization rates of N-acetylalanine-N<sup>ε</sup>-methylamide, *Biopolymers.* 32 (1992) 523–535. doi:10.1002/bip.360320508.
- [28] H.C. Andersen, H. C., Molecular dynamics simulations at constant pressure and/or temperature, *J. Chem. Phys.* 72 (1980) 2384–2393. doi:10.1063/1.439486.
- [29] T. Darden, D. York, L. Pedersen, Particle mesh Ewald: An  $N \cdot \log(N)$  method for Ewald sums in large systems, *J. Chem. Phys.* 98 (1993) 10089–10092. doi:10.1063/1.464397.
- [30] U. Essmann, L. Perera, M.L. Berkowitz, T. Darden, H. Lee, L.G. Pedersen, A smooth particle

- 550 mesh Ewald method, *J. Chem. Phys.* 103 (1995) 8577–8593. doi:10.1063/1.470117.
- [31] X.W. and P.A.K. D.A. Case, V. Babin, J.T. Berryman, R.M. Betz, Q. Cai, D.S. Cerutti, T.E. Cheatham, III, T.A. Darden, R.E. Duke, H. Gohlke, A.W. Goetz, S. Gusarov, N. Homeyer, P. Janowski, J. Kaus, I. Kolossváry, A. Kovalenko, T.S. Lee, S. LeGrand, T. Luchko, R. Luo, B., Amber 14, University of California, San Francisco., San Francisco, 2014.
- 555 [32] J.A. Maier, C. Martinez, K. Kasavajhala, L. Wickstrom, K.E. Hauser, C. Simmerling, ff14SB: Improving the Accuracy of Protein Side Chain and Backbone Parameters from ff99SB., *J. Chem. Theory Comput.* 11 (2015) 3696–713. doi:10.1021/acs.jctc.5b00255.
- [33] W. Humphrey, A. Dalke, K. Schulten, VMD: visual molecular dynamics., *J. Mol. Graph.* 14 (1996) 33–8, 27–8. <http://www.ncbi.nlm.nih.gov/pubmed/8744570> (accessed July 11, 2017).
- 560 [34] S. Genheden, U. Ryde, The MM/PBSA and MM/GBSA methods to estimate ligand-binding affinities., *Expert Opin. Drug Discov.* 10 (2015) 449–61. doi:10.1517/17460441.2015.1032936.
- [35] T. Hou, J. Wang, Y. Li, W. Wang, Assessing the Performance of the MM/PBSA and MM/GBSA Methods. 1. The Accuracy of Binding Free Energy Calculations Based on
- 565 Molecular Dynamics Simulations, *J. Chem. Inf. Model.* 51 (2011) 69–82. doi:10.1021/ci100275a.
- [36] T.N. Petersen, S. Brunak, G. von Heijne, H. Nielsen, SignalP 4.0: discriminating signal peptides from transmembrane regions, *Nat. Methods.* 8 (2011) 785–786. doi:10.1038/nmeth.1701.
- 570 [37] G.E. Crooks, G. Hon, J.-M. Chandonia, S.E. Brenner, WebLogo: A Sequence Logo Generator, *Genome Res.* 14 (2004) 1188–1190. doi:10.1101/gr.849004.
- [38] N.D. Rawlings, A.J. Barrett, MEROPS: the peptidase database., *Nucleic Acids Res.* 28 (2000) 323–5. <http://www.ncbi.nlm.nih.gov/pubmed/10592261> (accessed July 8, 2017).
- [39] P. V Mazin, M.S. Gelfand, A.A. Mironov, A.B. Rakhmaninova, A.R. Rubinov, R.B. Russell,
- 575 O. V Kalinina, An automated stochastic approach to the identification of the protein specificity determinants and functional subfamilies, *Algorithms Mol. Biol.* 5 (2010) 29. doi:10.1186/1748-7188-5-29.
- [40] F.L. Simonetti, E. Teppa, A. Chernomoretz, M. Nielsen, C. Marino Buslje, MISTIC: Mutual information server to infer coevolution., *Nucleic Acids Res.* 41 (2013) W8-14. doi:10.1093/nar/gkt427.
- 580 [41] J.-O. Janda, A. Popal, J. Bauer, M. Busch, M. Klocke, W. Spitzer, J. Keller, R. Merkl, H2rs: Deducing evolutionary and functionally important residue positions by means of an entropy and similarity based analysis of multiple sequence alignments, *BMC Bioinformatics.* 15 (2014) 118. doi:10.1186/1471-2105-15-118.
- 585 w1: <https://www.ebi.ac.uk/Tools/hmmer/search/hmmsearch> 07/13/17

w2: <http://prody.csb.pitt.edu/> 07/13/17



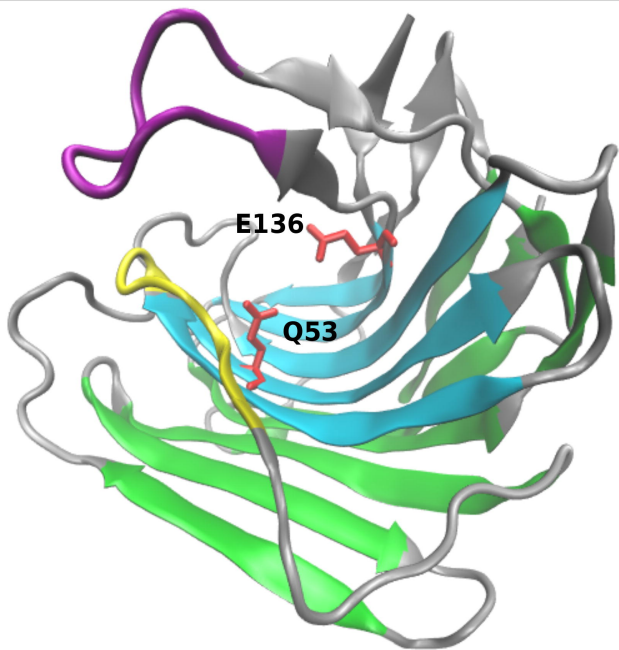

```

      * 20 * 40 * 60 * 80 * 100
21FW : .....-TV---ESN-----GAILI---G---SDFDVTSAT---120
1Y43 : .....-TV---ESN-----GAILI---G---SDFDVTSAT---120
EFCq000001 : MKFSFAAAAGIVAAAPGK---LVORDYSPLVPR-SARARHSSAPNR-RLSAESVESLTLNSTGVKNAHY-SSN-----SCAVOI---G---NGYNHVTGT---
EFCpa000003 : MKLITVASAVLCSATGLAAPF-THIRQERNRARA--AGRRGN-PMNRALAPES-----BNTHVSY-STN-----SCAVLV---G---TGYTSVIAO---
EFCpu000013 : MRDAKRASGRSSOPLLEEQAA-----VVKTGGQTQEEY-SON-----CAVWSKP-A---GTFATVIGT---
EFAFu000001 : MKFTSLASGLLLATAIAAPL---TEQROARHARRRLARTANRSSH-PP---YKPGT-S-EVIKLSNTTQVEY-SSN-----CAVLI---G---TGYTAVIGE---
EFTma000007 : MIFSIKTLVPLLLAGTAIA---SPATIPAARRFRFGSDASAFNFT-----SSADEASAAATLGTYT-FTN-----CAFLRN---G---TAVTSVIGT---
EFBF000002 : MKFSWAATAVLAGSAVAAPG---TALR---QARAVKRAAGTHGN-PV---KYVQGPSS---EVTNKTDVSY-SSN-----CAVLV---G---TGYTSVIGT---
EFPch000001 : MKFSTLILSAALLASATAIAPL-TERRAARHAARAADRAISR-PA---AKODT-L-ELVSLNGTSHAQY-SSN-----CAVLI---G---TGYTSVIGT---
EFAF1000001 : MKFLALSSTVLASVALASPL---TLERRARNAARLQARVAQRH6N---LPFKAGTNEILHLNETTHEEY-SSN-----CAVLI---G---SGYTSVIGT---

EFAo000001 : .....-MK---L---FAIL-----SSTVLASVALASPL-TLERRARNAARLQ
EFBS000001 : .....-MMSAEKRREGVGLQIWKREFACVVRRAVGDTPRRRDCAQH---KCKCNTNPLRL-SVFEPPSKPYGTIPLMQLSFFLFLYTWIVSRTT
EFTa000006 : .....-MKSAILAITTAALASALERS-----TSASPPOTL-DRV-----SCKVOS---G---SGFTSVIGT---
EFTs000011 : .....-DTKSALVGDGLIQHSAMESPLPT-LARAGPLVPSSTSDGEADGNSGSRNMG---CALIELPPP-G---TFFTSVIGT---
EFPde00001 : .....-MRQSIILALSAIAQ/FAAP---ATYN-ARGNSSV---QGO-G---DFF-----GAVOE---G---TGMNFOGSS---
BCa0000005 : MAISRVRVGLVWLAA66-----VLLATALAGPAAA-----ATASPASPHYDHARHS-DOI-----GAYDTG-----ARFTSVIGS---

      * 140      * 160      * 180      * 200      * 220      * 240 *
AM2SASGGSS-AA-----GTAIVG-DGDI-C-OTALOTGDFDWY---6DG YDA YENYFEVS-DD-SGTHISEGDSIQIVSATSDI
-----QSEEYCAIVG-DGDI-C-ETALOTGDFC---YEDDQTS YDA YENYFDYA-YD-SGTHISEGDSIKIVSATSK
ITVFEVSGNS-GDA-----SAIVG-DGDI-C-ETALOTGDFC---YEDDQTS YDA YENYFDYA-YD-SGTHISEGDSIKIVSATSK
FVATPFSGGG-----SAIVG-DGDI-C-OTALOTGDFC---YEDDQTS YDA YENYFDYA-YD-SGTHISEGDSIKIVSATSK
FTVITASGG-----SAIVG-DGDI-C-ETALOTGDFC---YEDDQTS YDA YENYFDYA-YD-SGTHISEGDSIKIVSATSK
FVITPSPVSGSS-----SAIVG-DGDI-C-ETALOTGDFC---YEDDQTS YDA YENYFDYA-YD-SGTHISEGDSIKIVSATSK
FVITKPSMPAGNS-----6KQYCAIVG-DGDI-C-SSALOTGDFC---YEDDQTS YDA YENYFDYA-YD-SGTHISEGDSIKIVSATSK
FTASPSIAGG-----6TBYCGAIVG-DGDI-C-SSALOTGDFC---YEDDQTS YDA YENYFDYA-YD-SGTHISEGDSIKIVSATSK
FTVAKPILPSDASS-----600SCAIVG-DGDI-C-SSALOTGDFC---YEDDQTS YDA YENYFDYA-YD-SGTHISEGDSIKIVSATSK
FTVITPSPAGSDSDE-----QYCAIVG-DGDI-C-QSALOTGDFC---YEDDQTS YDA YENYFDYA-YD-SGTHISEGDSIKIVSATSK

ARVAORHNSLPPFKAGTNEI-----L-----HLNETTHEEY-SSN-----SALOTGDFC---YEDDQTS YDA YENYFDYA-YD-SGTHISEGDSIKIVSATSK
NLGKVGTRVYGNHQYLQSQPIQDSTALMRCSRIARYTENAHGIPKHTGASHAVVGSNSNF-----ESQCGG-NWA-VERSKVYTA-YG-SYET-SCL-DNFN-TGGDMQ-DIVTILVI
FTIKGKKS-----FGPIHVG-DGDI-C-CPGRGRTG-RLT-----GNGAFGFEVLSA-PM-KSE-SEGDRR-TIMAYGFS
FTVSGASG-----LEVGEDCFATVHG-G-ES-----ALCAGLTLFNASTSETVTPVH-EFDFP-HV-NGITMLVGVSVS-VQSSISI
VVWVNSGGDP-----HQSAMVHG-DGDI-C-SSALOTGDFC---YEDDQTS YDA YENYFDYA-YD-SGTHISEGDSIKIVSATSK
MTVALNCSSTRN-----SSVPTG-DGDI-C-SDTEGTFDQD---CENGVAAYPLVENVGADS-NFTE-T-KAGTITASVSG-S
Q G E
G D I V

      * 260 * 280      * 300 * 320 * 340      * 360 * 380 *
SSSATENITKOKKKSFE-NE-SS-G-S-ORINAETIETEE-ONSNGQEPFSPSPA-EFTDCSVT-SDGE-SLDDQITQVLIIN-NQDVTGCS-V-SG-TTKQY-----:206
SSSATENITKOKKKSFE-NE-SS-G-S-ORINAETIETEE-ONSNGQEPFSPSPA-EFTDCSVT-SDGE-SLDDQITQVLIIN-NQDVTGCS-V-SG-TTKQY-----:173
KQVATENITKOKKKSFE-NE-SS-G-S-ORINAETIETEE-ONSNGQEPFSPSPA-EFTDCSVT-SDGE-SLDDQITQVLIIN-NQDVTGCS-V-SG-TTKQY-----:266
AKKATENITKOKKKSFE-NE-SS-G-S-ORINAETIETEE-ONSNGQEPFSPSPA-EFTDCSVT-SDGE-SLDDQITQVLIIN-NQDVTGCS-V-SG-TTKQY-----:256
ACSVAIENITKOKKKSFE-NE-SS-G-S-ORINAETIETEE-ONSNGQEPFSPSPA-EFTDCSVT-SDGE-SLDDQITQVLIIN-NQDVTGCS-V-SG-TTKQY-----:229
ACATENITKOKKKSFE-NE-SS-G-S-ORINAETIETEE-ONSNGQEPFSPSPA-EFTDCSVT-SDGE-SLDDQITQVLIIN-NQDVTGCS-V-SG-TTKQY-----:269
ACSATENITKOKKKSFE-NE-SS-G-S-ORINAETIETEE-ONSNGQEPFSPSPA-EFTDCSVT-SDGE-SLDDQITQVLIIN-NQDVTGCS-V-SG-TTKQY-----:270
TQATENITKOKKKSFE-NE-SS-G-S-ORINAETIETEE-ONSNGQEPFSPSPA-EFTDCSVT-SDGE-SLDDQITQVLIIN-NQDVTGCS-V-SG-TTKQY-----:257
SSSAVDENITKOKKKSFE-NE-SS-G-S-ORINAETIETEE-ONSNGQEPFSPSPA-EFTDCSVT-SDGE-SLDDQITQVLIIN-NQDVTGCS-V-SG-TTKQY-----:270
ACATENITKOKKKSFE-NE-SS-G-S-ORINAETIETEE-ONSNGQEPFSPSPA-EFTDCSVT-SDGE-SLDDQITQVLIIN-NQDVTGCS-V-SG-TTKQY-----:271

ACATENITKOKKKSFE-NE-SS-G-S-ORINAETIETEE-ONSNGQEPFSPSPA-EFTDCSVT-SDGE-SLDDQITQVLIIN-NQDVTGCS-V-SG-TTKQY-----:223
TENVRIENITKOKKKSFE-NE-SS-G-S-ORINAETIETEE-ONSNGQEPFSPSPA-EFTDCSVT-SDGE-SLDDQITQVLIIN-NQDVTGCS-V-SG-TTKQY-----:322
SSSATENITKOKKKSFE-NE-SS-G-S-ORINAETIETEE-ONSNGQEPFSPSPA-EFTDCSVT-SDGE-SLDDQITQVLIIN-NQDVTGCS-V-SG-TTKQY-----:220
TENVRIENITKOKKKSFE-NE-SS-G-S-ORINAETIETEE-ONSNGQEPFSPSPA-EFTDCSVT-SDGE-SLDDQITQVLIIN-NQDVTGCS-V-SG-TTKQY-----:243
SWLLEHTIRVSKIFHESG-----DDLSSAIVELGNG-----IOPVAFEG-SITIEDLTNGK---PLASAGTPNSVVE---RGNTPLTKNSALSGGFSKSWHS-----:243
N
IVE F I
```

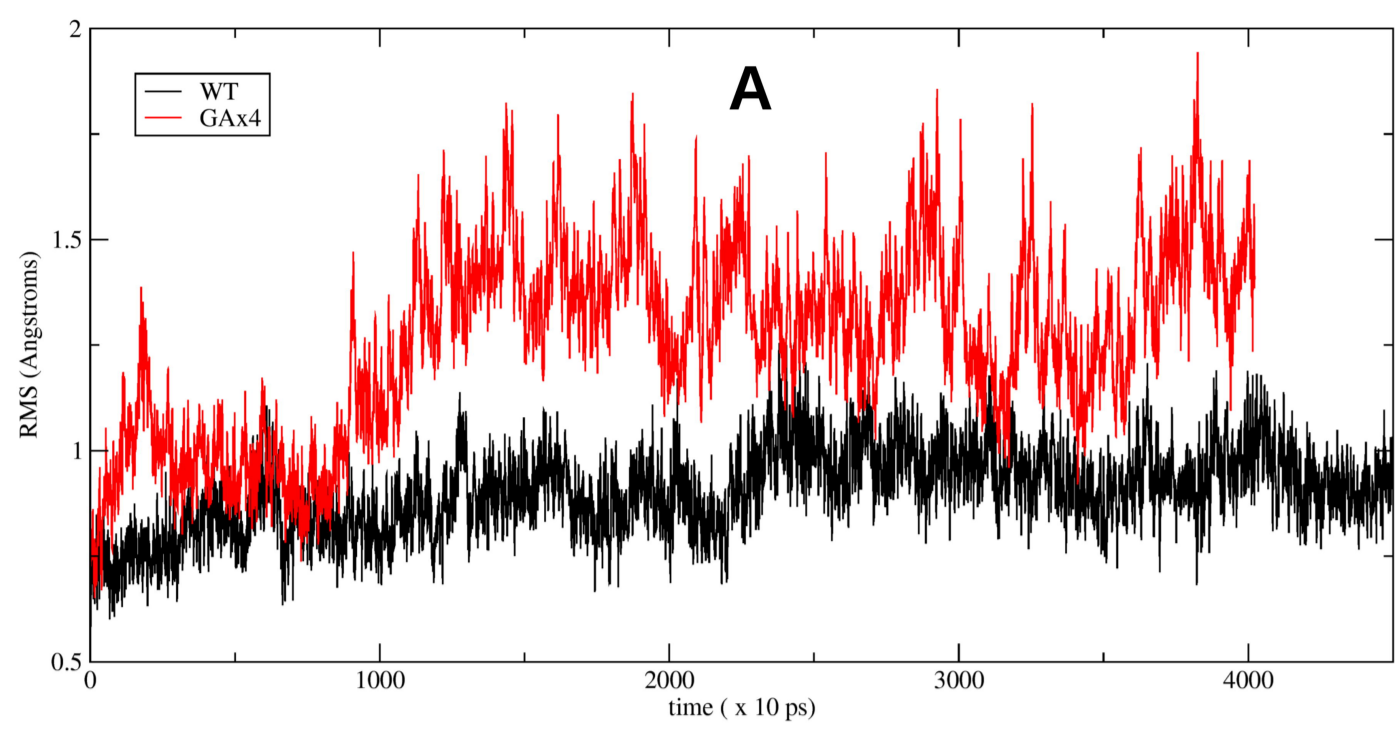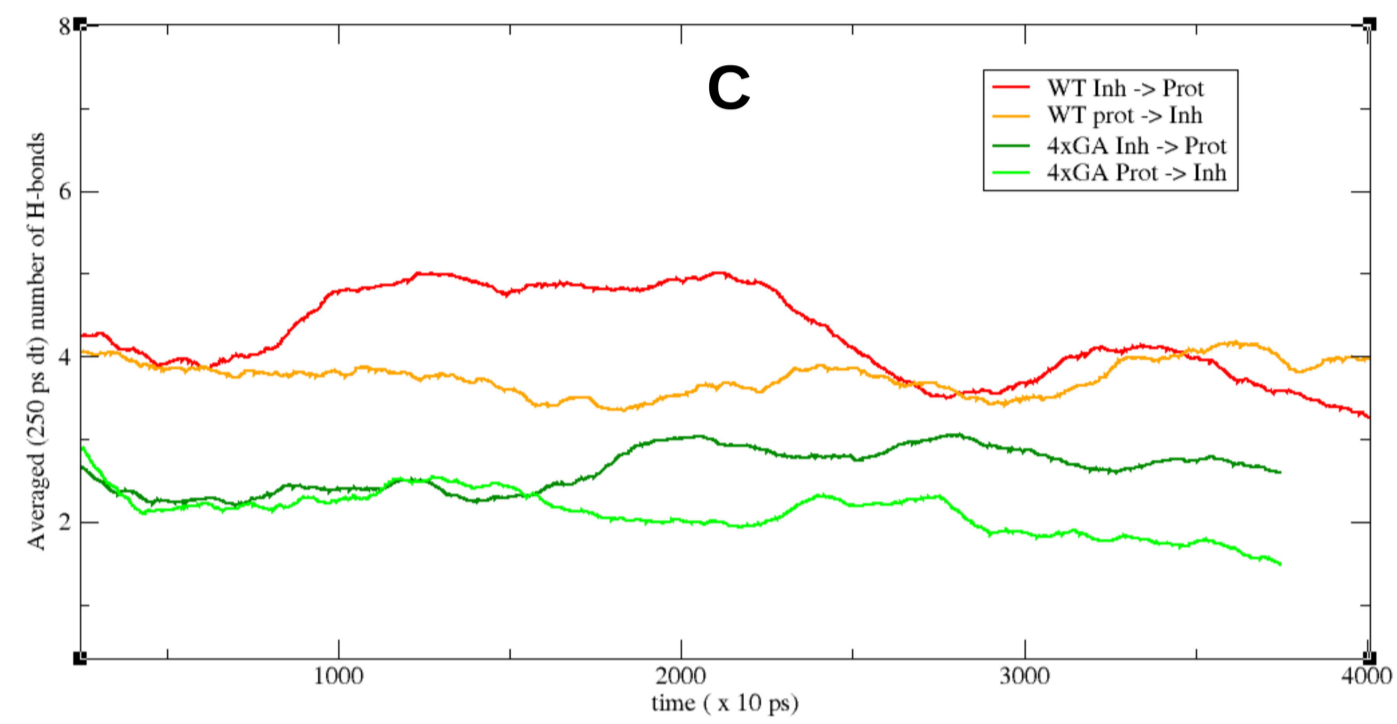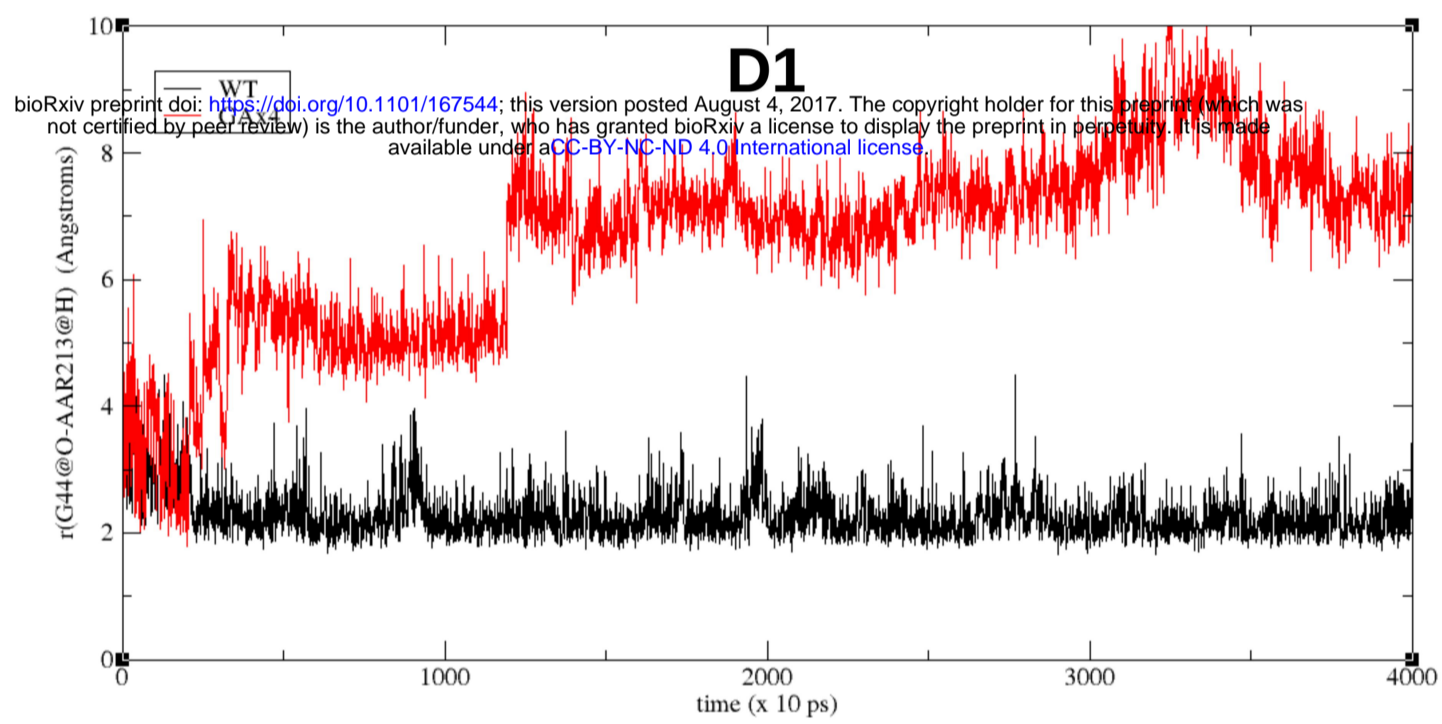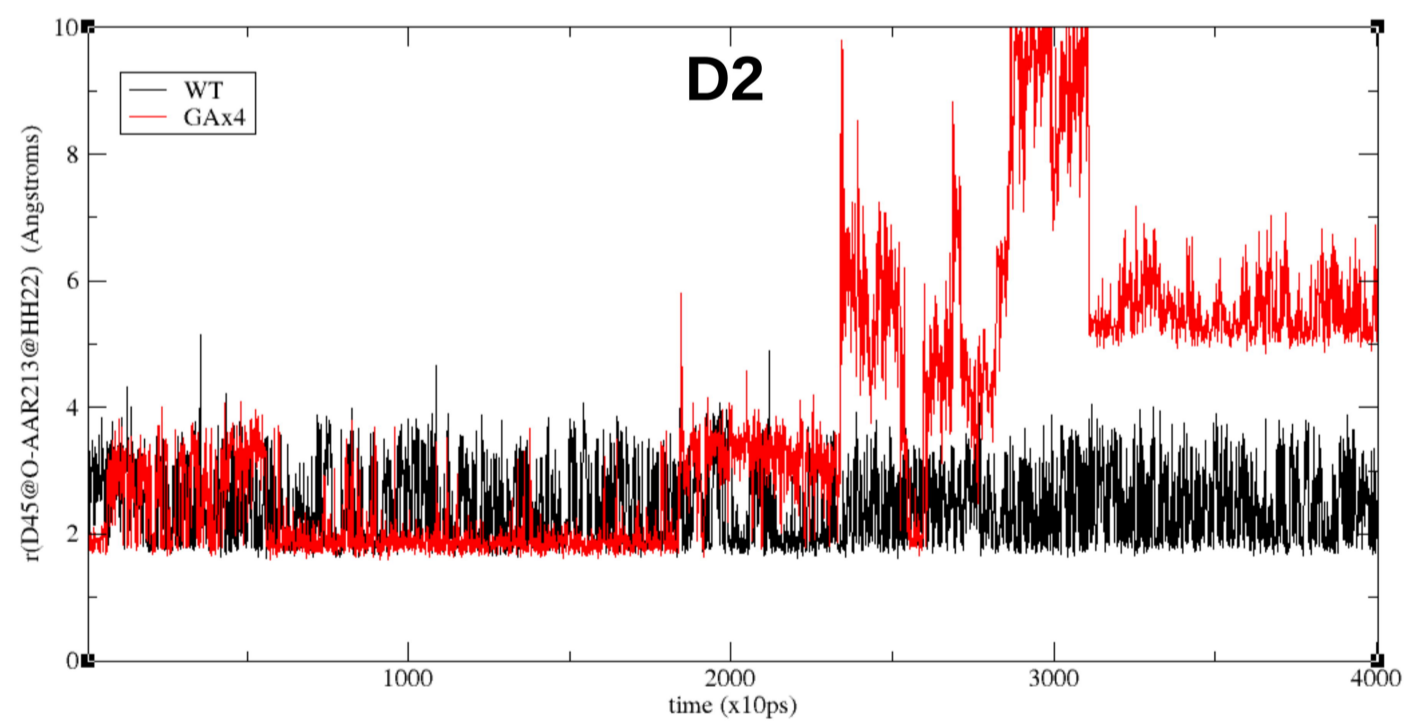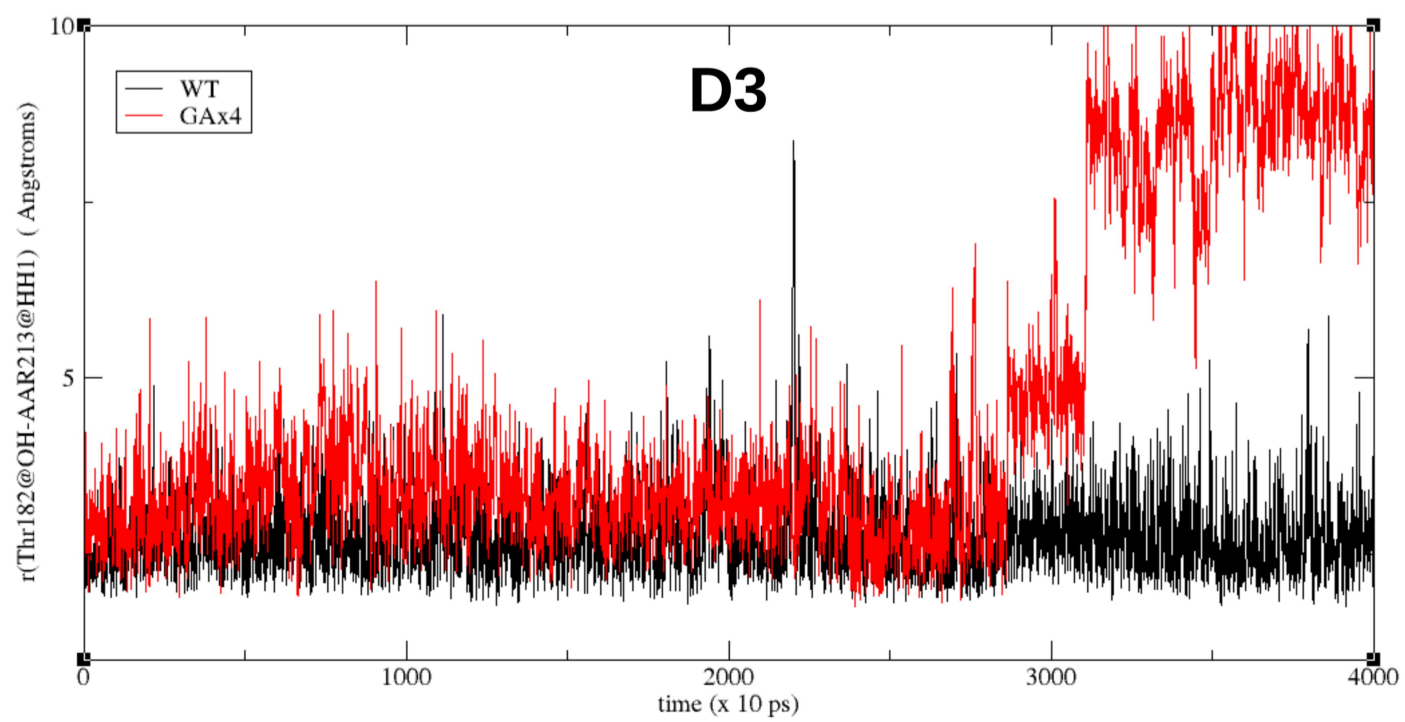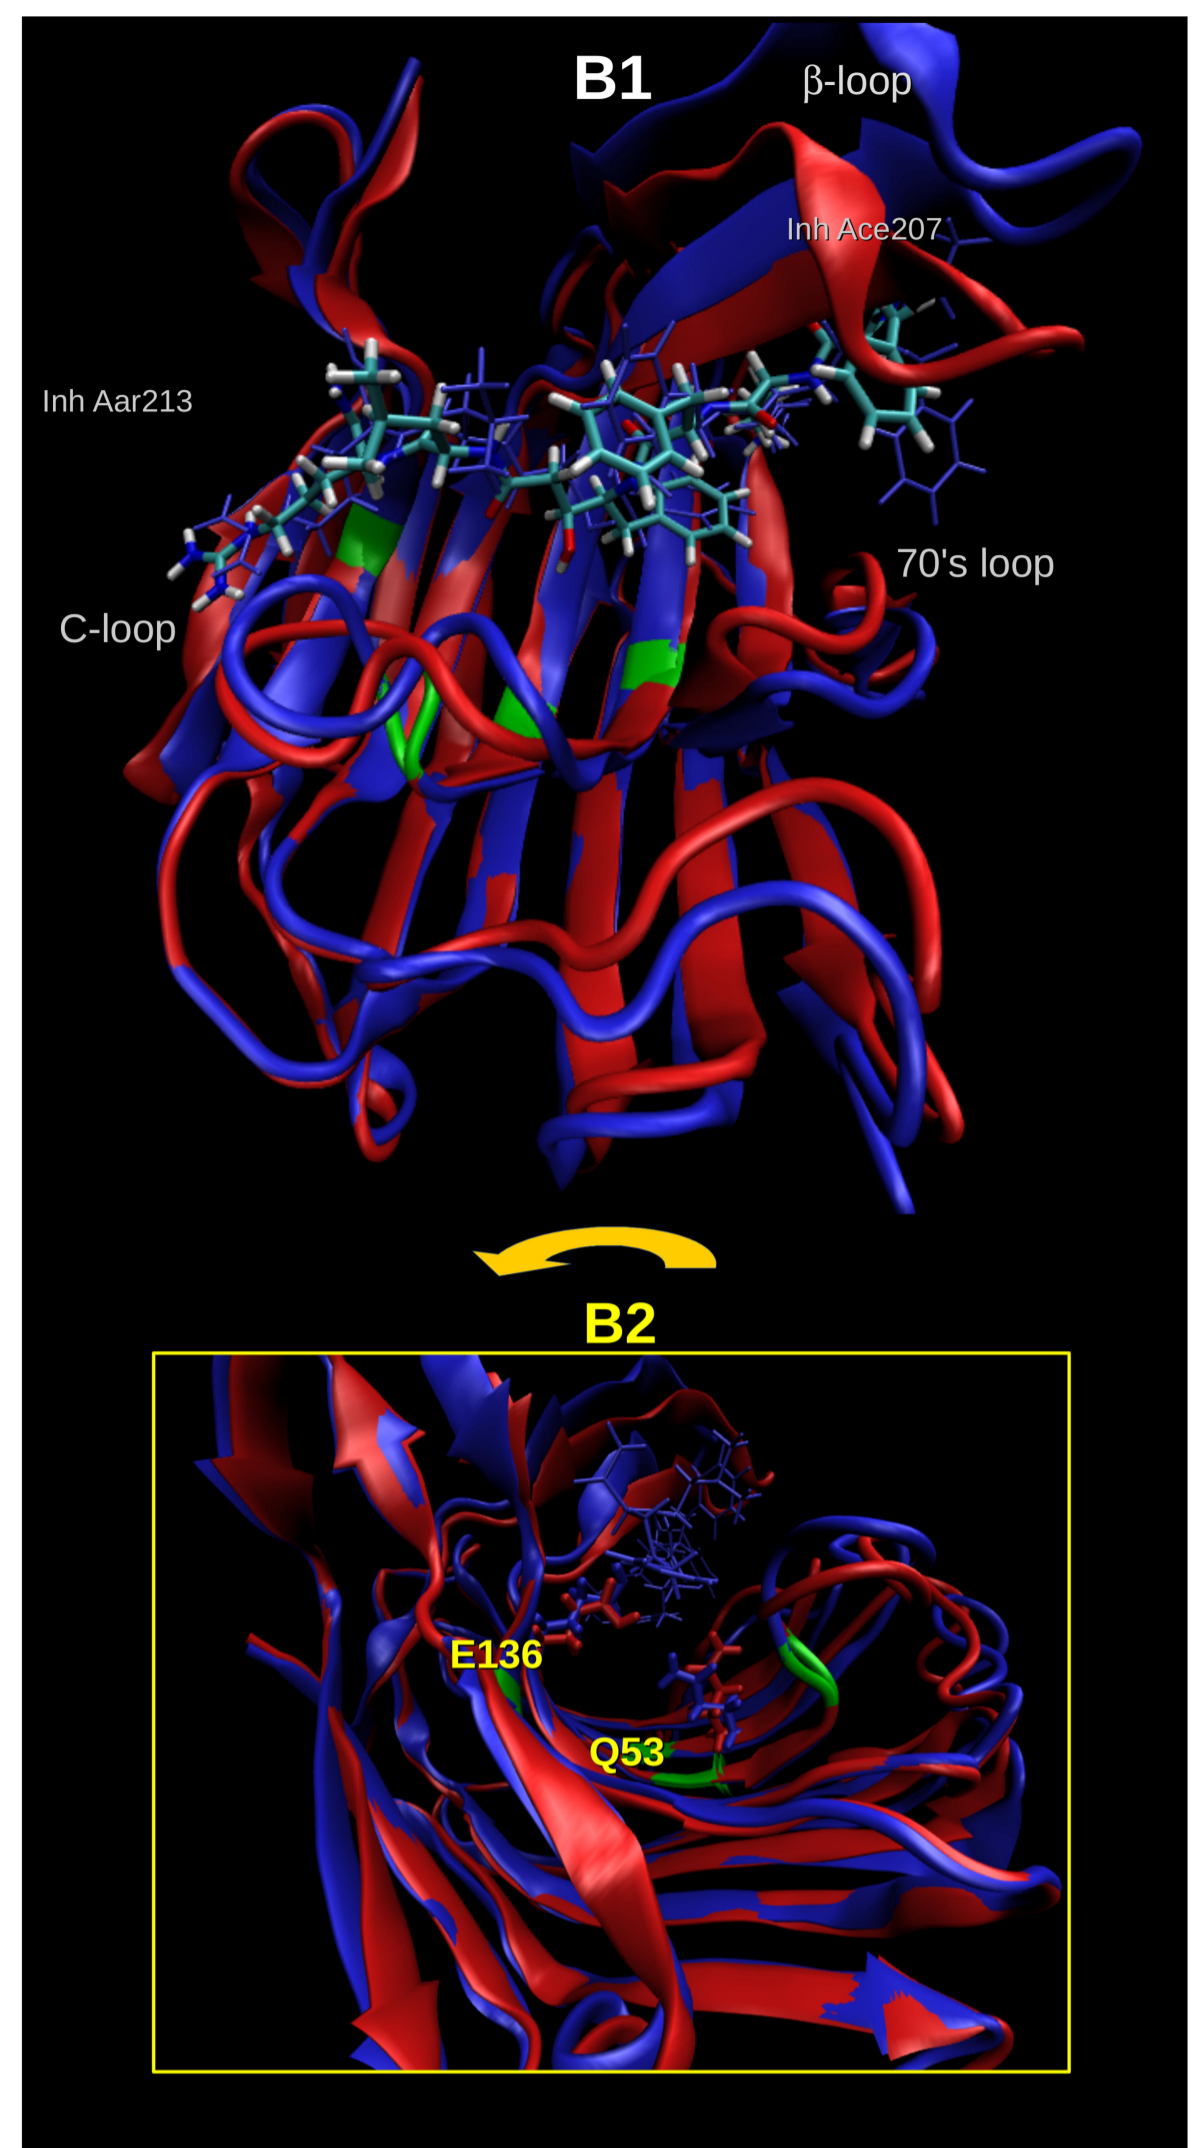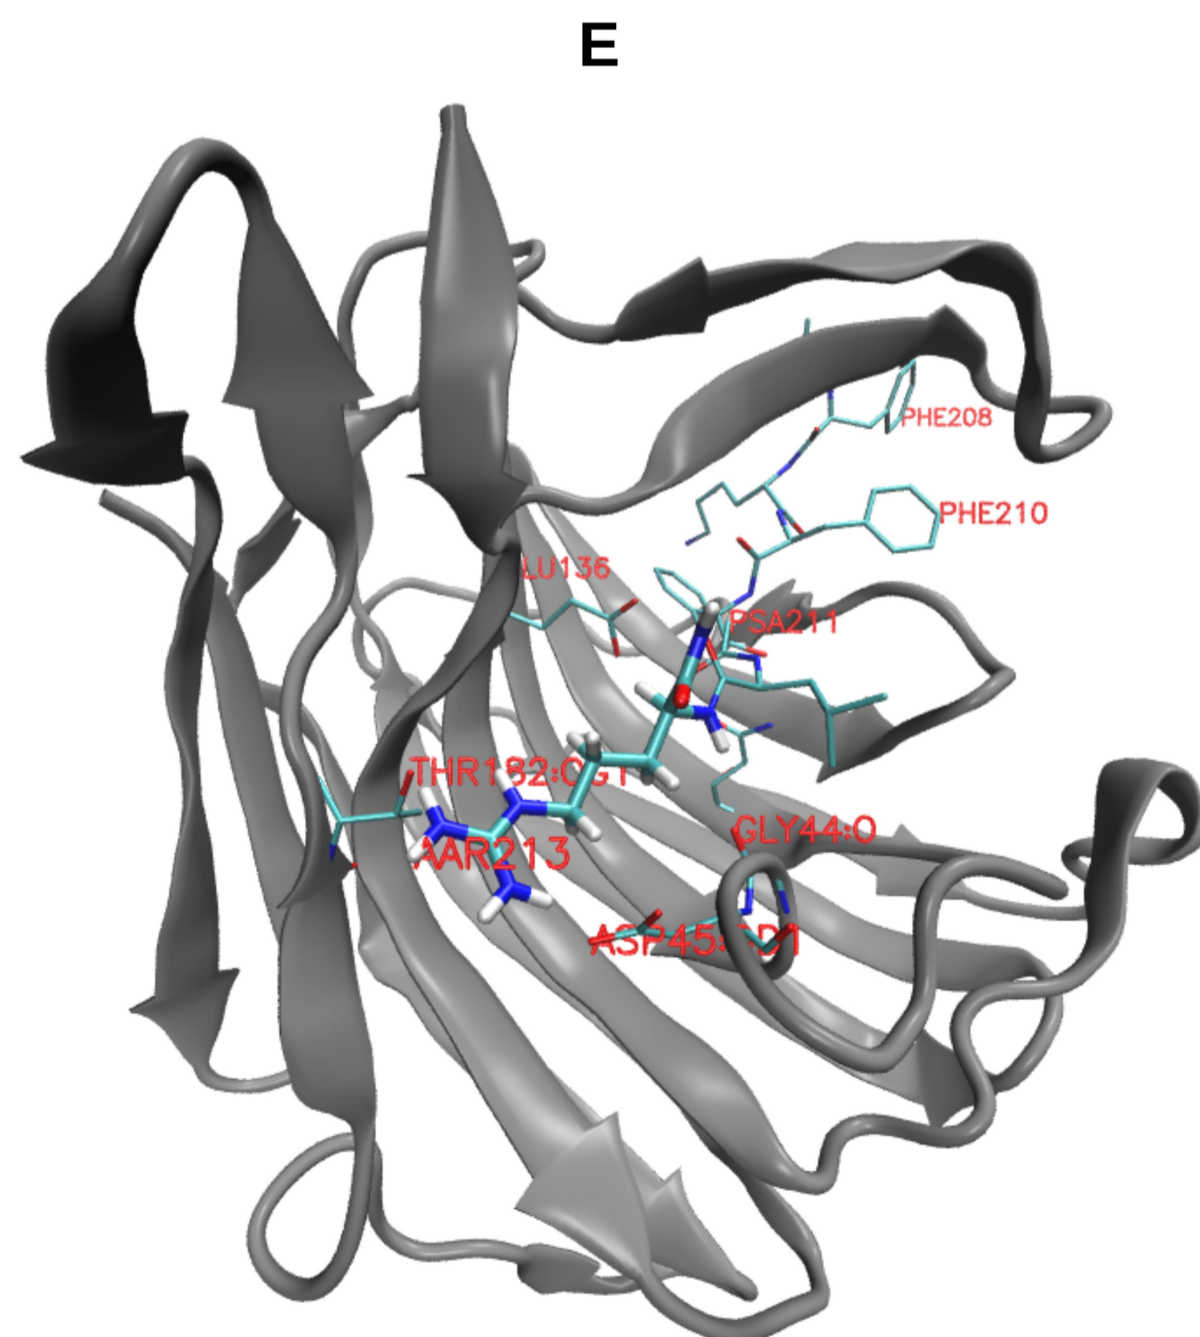

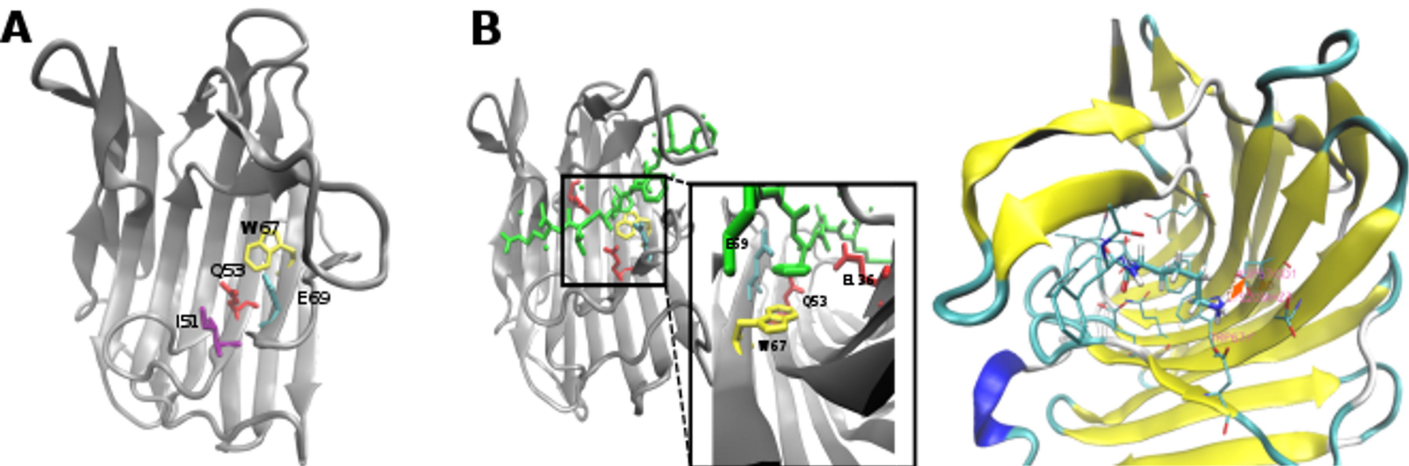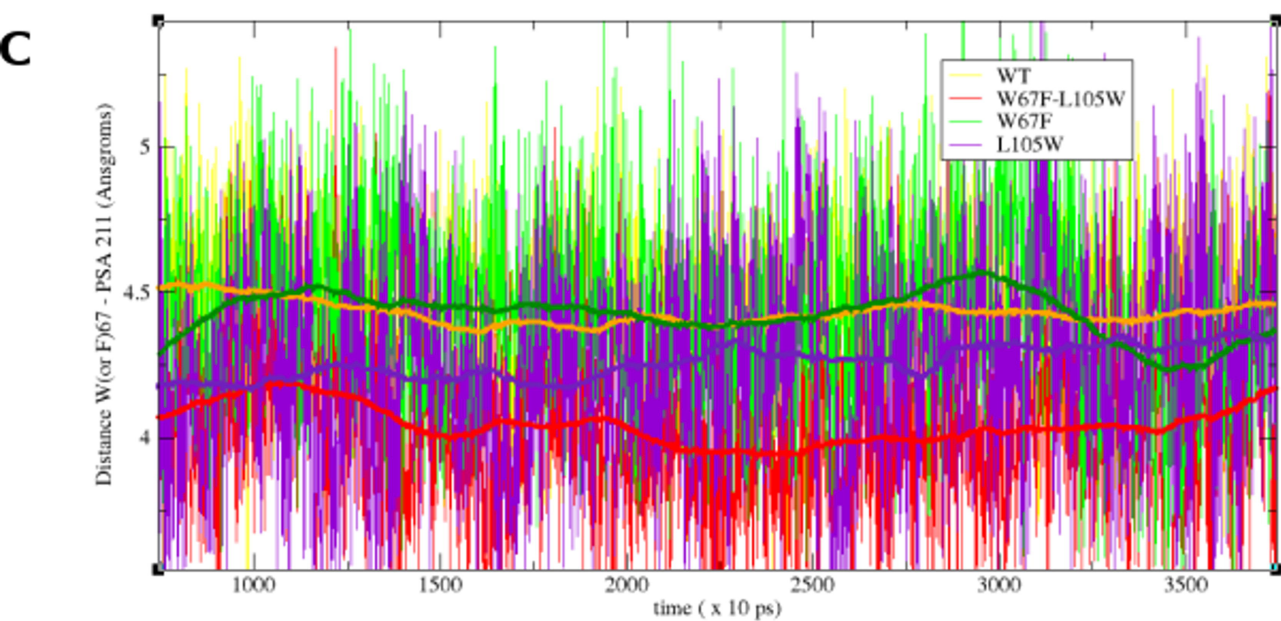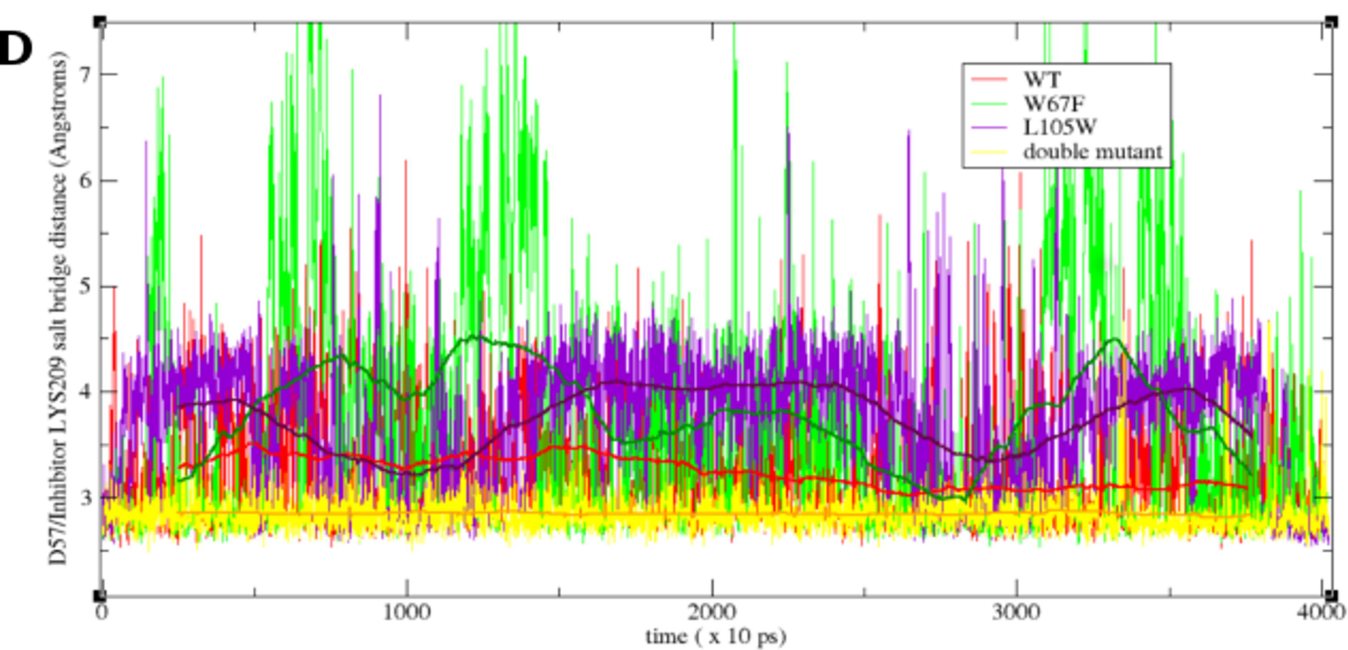

**E**

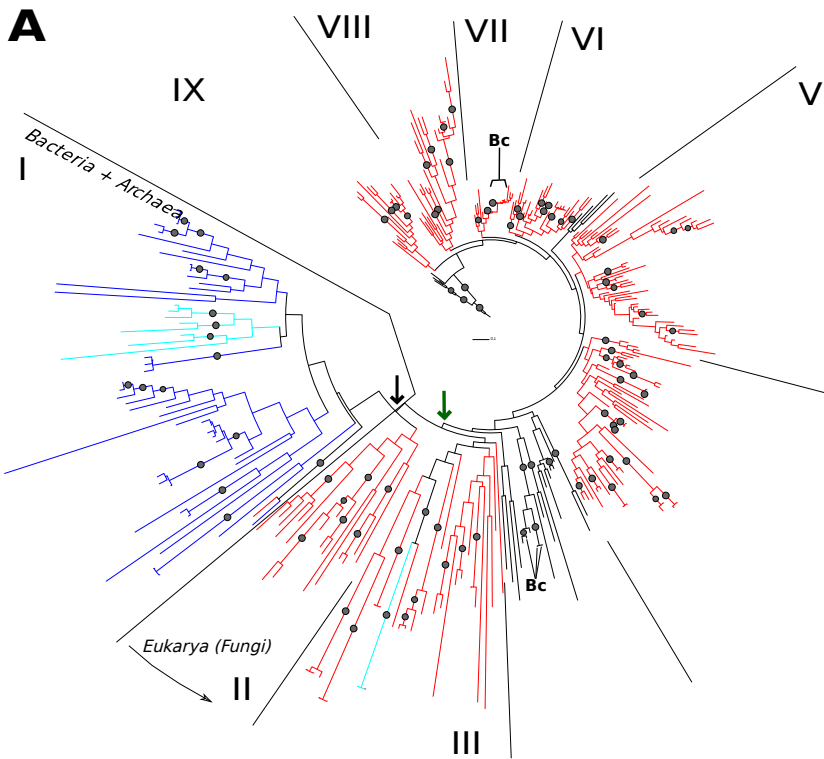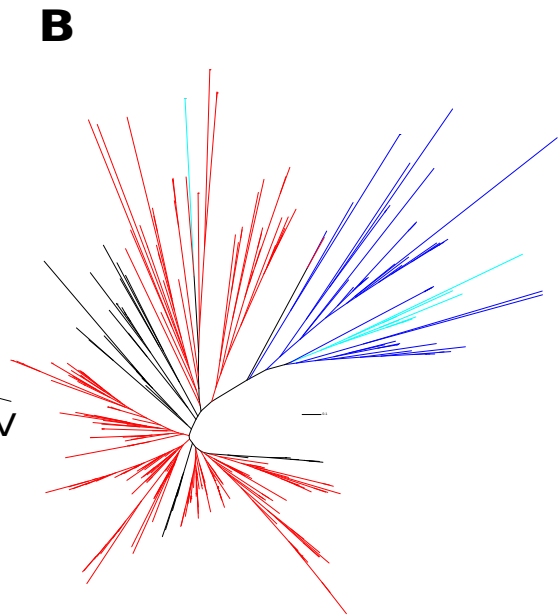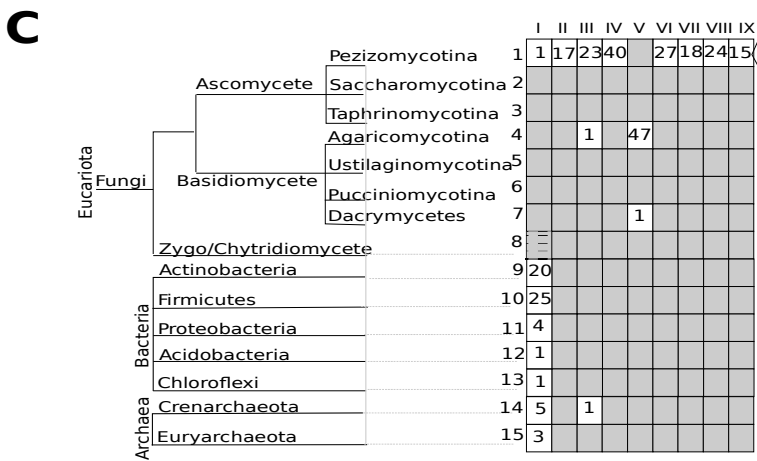

|  | I | II | III | IV | V  | VI | VII | VIII | IX |                    |
|--|---|----|-----|----|----|----|-----|------|----|--------------------|
|  |   |    | 4   | 1  |    |    | 2   |      |    | A: Dothideomycetes |
|  |   | 5  | 13  |    | 7  |    | 10  |      |    | B: Eurotiomycetes  |
|  | 1 | 12 | 8   | 26 | 18 | 16 | 11  | 8    |    | C: Pezizomycetes   |
|  | 5 | 6  |     |    | 2  |    | 3   | 7    |    | D: Sordariomycetes |

1A: EFBm, EFBso, EFNp, EFPf, EFPno, EFSm, EFSs, EFSt, EFZt  
 1B: EFBs, EFPch, EFPd, EFPo, EFSsc, EFTma, EFTs  
 1C: EFAc, EFAfl, EFAfu, EFAk, EFAnid, EFAo, EFAo, EFAt, EFBb, EFBc, EFBf, EFBg, EFBp, EFBt, EFCg, EFCf, EFCo, EFCpa, EFDse, EFDt, EFEI, EFGI, EFHb, EFMb, EFMc, EFMf, EFNf, EFPa, EFPt, EFPtr, EFRc, EFSI, EFTa, EFTmi, EFTt, EFTv, EFTvi  
 1D: EFCgl, EFCm, EFCpur, EFCt, EFFF, EFFo, EFGc, EFMac, EFMa, EFMo, EFMt, EFOg  
 4: EFAd, EFCpu, EFDs, EFFp, EFGt, EFPca, EFPn, EFPs, EFSc, EFSh, EFTve  
 7: EFDac  
 9: BAF, BAmi, BAb, BAbe, BAm, BAv, BCa, BPse, BSc, BSp, BSc, BSp  
 10: BAa, BAac, BAsp, Bbt, Bpl, BPsp, BPv, Bsa, Bst  
 11: BBi, BBsp, BBv  
 12: Bgt  
 13: Bkr  
 14: AAs, ACm, AuC, Avd, AVm  
 15: APt, ATa  
 NC: EPEm (Protista, no considerado en esta tabla)

**A****Clades**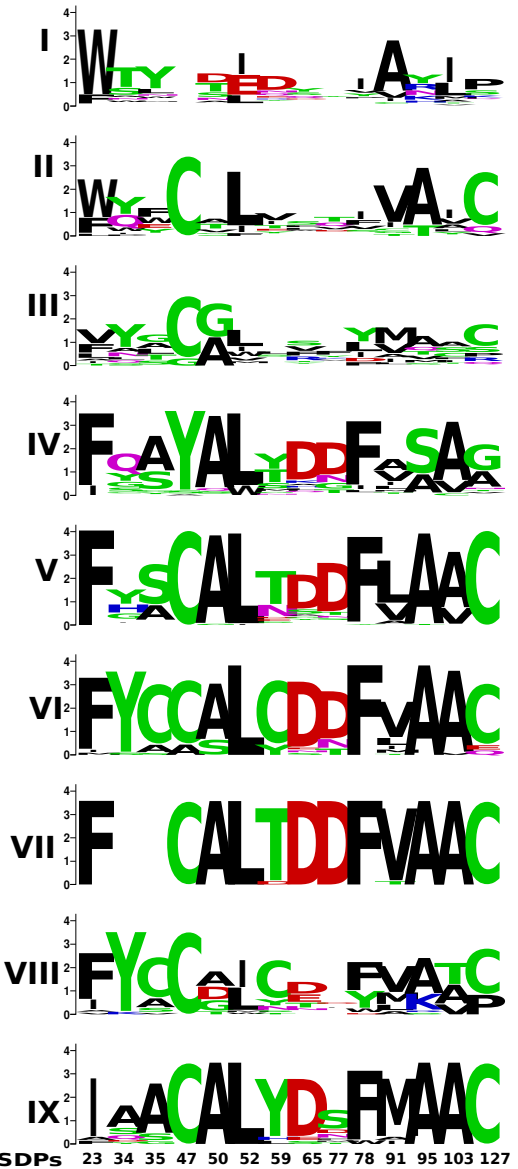

SDPs 23 34 35 47 50 52 59 65 77 78 91 95 103 127

**B**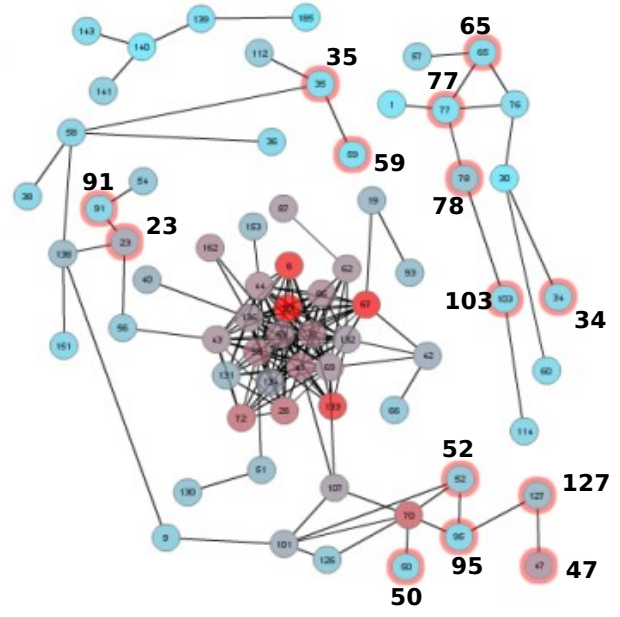

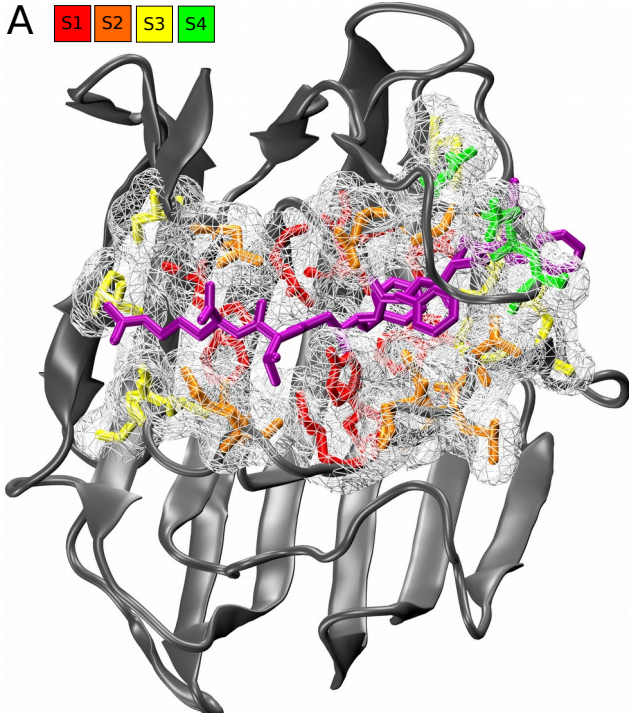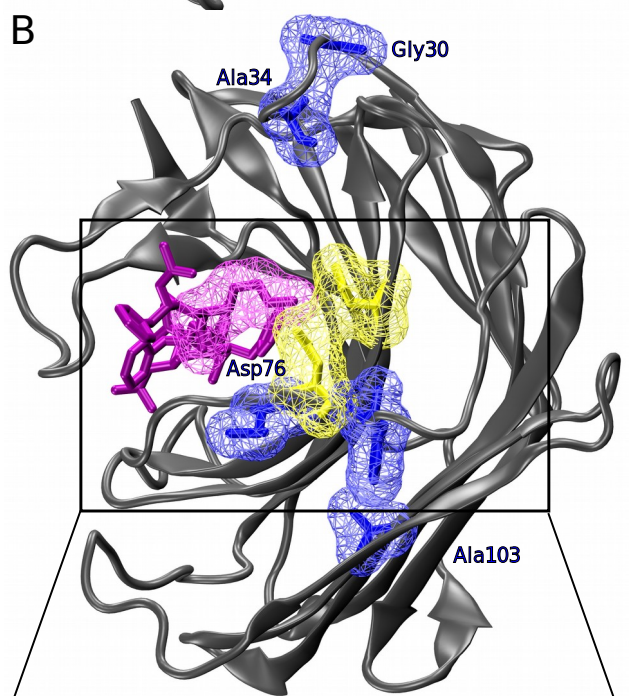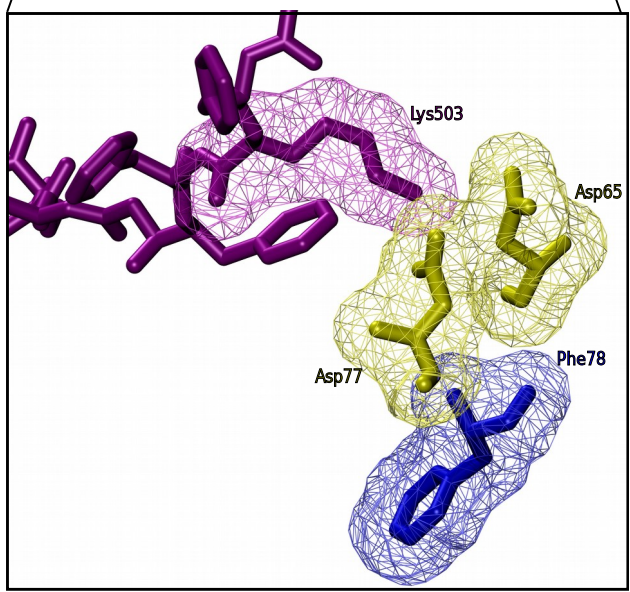

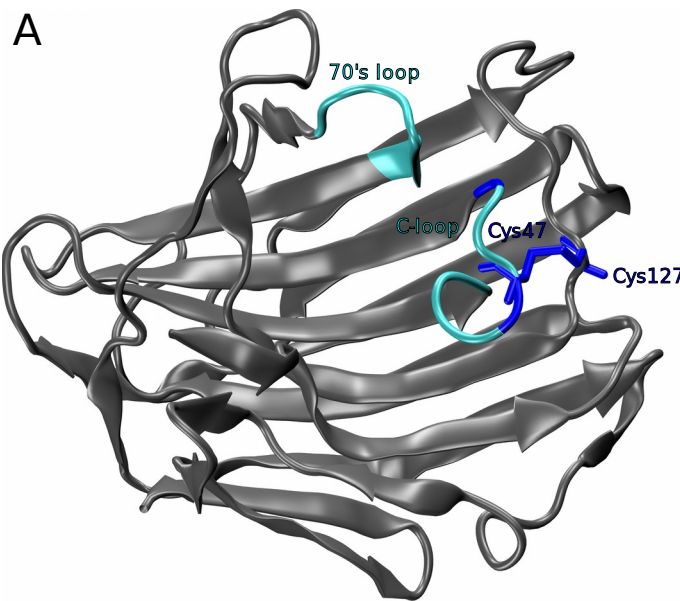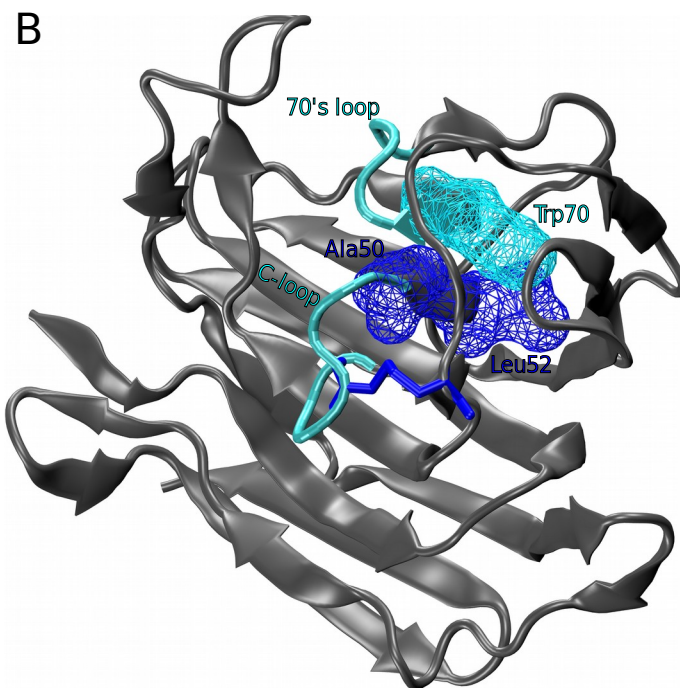

Source: https://www.biorxiv.org/content/10.1101/167544v1.full.pdf
